# Supplementary material for: MIRA: Joint regulatory modeling of multimodal expression and chromatin accessibility in single cells
Source: bioRxiv or medRxiv preprint supplement (doi:10.1101/2021.12.06.471401), 2022-04-29
Supplement: Supplementary file [file media-1.pdf]

**Extended Data for:**

**MIRA: Joint regulatory modeling of multimodal expression and chromatin accessibility in single cells**

**Allen W. Lynch<sup>\* 1,2</sup>, Christina V. Theodoris<sup>\* 1, 3-4</sup>, Henry Long<sup>2,5</sup>, Myles Brown<sup>2,5</sup>, X. Shirley Liu<sup># 1-2, 6</sup>, Clifford A. Meyer<sup># 1-2, 6</sup>**

<sup>1</sup> Department of Data Science, Dana-Farber Cancer Institute, Boston MA, USA.

<sup>2</sup> Center for Functional Cancer Epigenetics, Dana-Farber Cancer Institute, Boston, MA, USA.

<sup>3</sup> Division of Genetics and Genomics, Boston Children's Hospital, Boston MA, USA.

<sup>4</sup> Harvard Medical School Genetics Training Program, Boston, USA.

<sup>5</sup> Department of Medical Oncology, Dana-Farber Cancer Institute, Brigham and Women's Hospital, and Harvard Medical School, Boston, MA, USA.

<sup>6</sup> Department of Biostatistics, Harvard T.H. Chan School of Public Health, Boston, MA, USA.

\* Contributed equally.

# Co-corresponding authors.

Correspondence to: cliff\_meyer@ds.dfc.harvard.edu, xsliu.res@gmail.com

## Extended Data

**Extended Data Table 1.** Gene set enrichments of each MIRA expression topic in the hair follicle dataset.

**Extended Data Table 2.** Motif enrichments of each MIRA accessibility topic in the hair follicle dataset.

**Extended Data Table 3.** Gene set enrichments of each MIRA expression topic in the IFE dataset.

**Extended Data Table 4.** Motif enrichments of each MIRA accessibility topic in the IFE dataset.

**Extended Data Table 5.** Gene set enrichments of each MIRA expression topic in the embryonic brain dataset.

**Extended Data Table 6.** Motif enrichments of each MIRA accessibility topic in the embryonic brain dataset.

The above Extended Data Tables are available at the following link:  
[https://github.com/AllenWLynd/MIRA\\_supplementary\\_tables](https://github.com/AllenWLynd/MIRA_supplementary_tables)

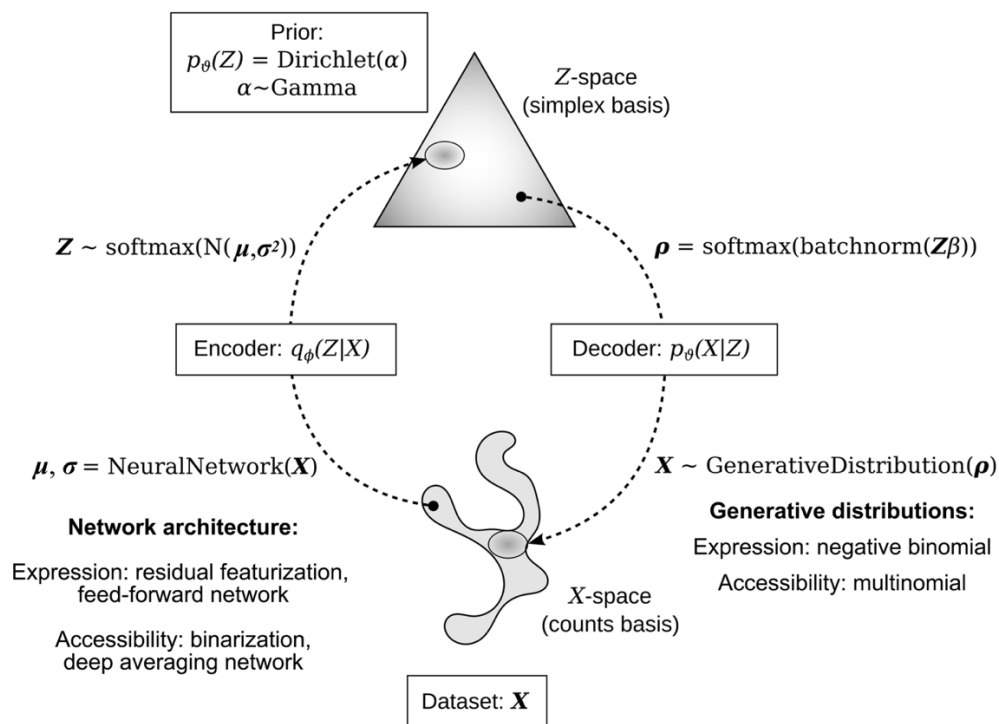

**Extended Data Fig. 1 | Overview of MIRA topic model architecture.** The MIRA topic model uses a variational autoencoder (VAE) approach to learn stochastic mappings between observations in  $X$ -space, gene-counts or peak-counts in a cell, which are high-dimensional and noisy, and a simpler latent  $Z$ -space or topic space, which exists on the simplex basis with a Dirichlet prior. (*bottom right*) The generative model relates the observations  $X$  to the estimated composition  $\rho$  over features (genes or peaks), sampling a negative binomial distribution for RNA counts and a multinomial distribution for ATAC peaks. (*top right*) The composition over features is given by the topic matrix  $\beta$  encoding topic-feature associations and the latent topics  $Z$  of a cell, which are sampled from the distribution  $q_{\phi}(Z|X)$ ,

the variational approximation of  $p_{\theta}(Z|X)$ . (*top left*) The distribution of  $Z$  is parameterized by  $\mu$  and  $\sigma^2$ , outputs from the encoder neural network given the  $X$ -space observations as inputs. (*bottom left*) The encoder neural network for RNA data performs deviance residual featurization of counts which are passed through feed-forward layers. The ATAC data encoder passes binarized peak accessibility features through a deep averaging network. (Illustration adapted from Kingma and Welling, *Foundations and Trends in Machine Learning*, 2019).

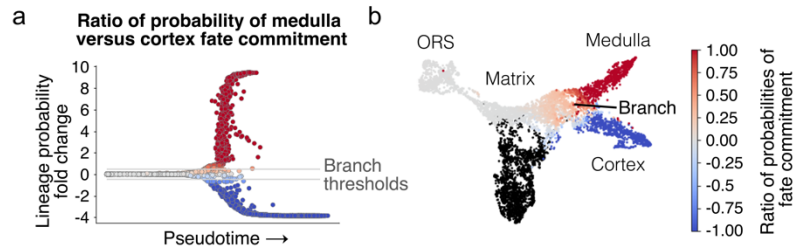

**Extended Data Fig. 2 | MIRA defines branch points between lineages where fate commitment probabilities diverge.** **a**, Ratio of probability of medulla fate commitment versus cortex commitment of each cell in the hair follicle, arranged by pseudotime. MIRA defines branch points between lineages where probabilities of differentiating into one terminal state diverges from another. **b**, MIRA joint representation UMAP colored by ratio of probability of medulla fate commitment within the ORS, matrix, medulla, and cortex populations. Differentiation in the hair follicle proceeds from ORS to progenitor matrix cells, which then specify into the medulla or cortex fate. (IRS cells indicated in black are not included in this trajectory).



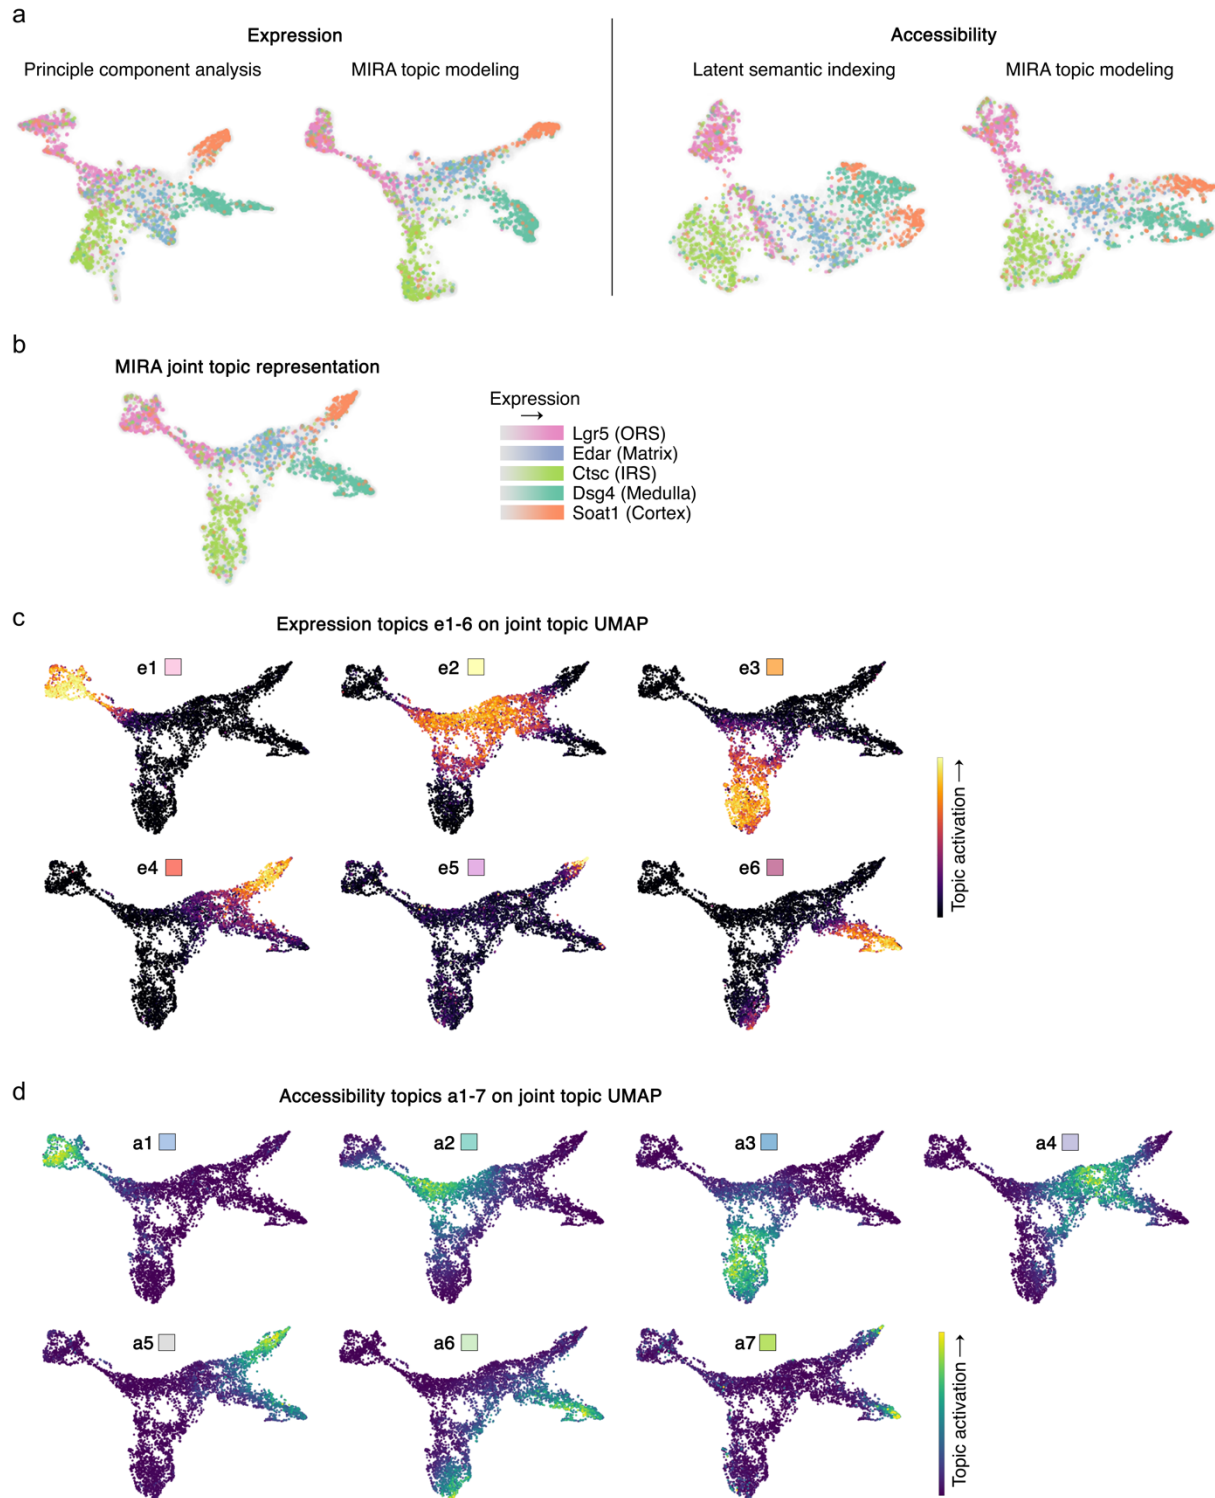

**Extended Data Fig. 3 | MIRA topics describing hair follicle cells were sparse and nonredundant.** **a**, UMAP based on standard methodology versus MIRA topic modeling for expression or accessibility. Standard principle component analysis (PCA)-based representation of expression shows matrix population as shifted away from its predecessor ORS and descendant IRS, medulla, and cortex cells. However, MIRA topic modeling of expression

appropriately represents matrix cells as an intermediate population between the aforementioned lineages. Standard latent semantic indexing (LSI)-based representation of accessibility shows ORS cells interjected between matrix and its descendant IRS and shows medulla situated between two separate cortex populations. Conversely, MIRA topic modeling of accessibility appropriately represents matrix cells as continuous with its descendant IRS and better separates medulla and cortex into two distinct branches. **b**, MIRA joint topic representation of expression and accessibility. In (a-b), colors demonstrate expression of marker genes of indicated lineages. **c**, MIRA expression topics e1-6 and **d**, MIRA accessibility topics a1-7 on joint representation UMAP. In (c-d), colored boxes correspond to topic colors as on stream graphs in Fig. 2c and Extended Data Fig. 4a.

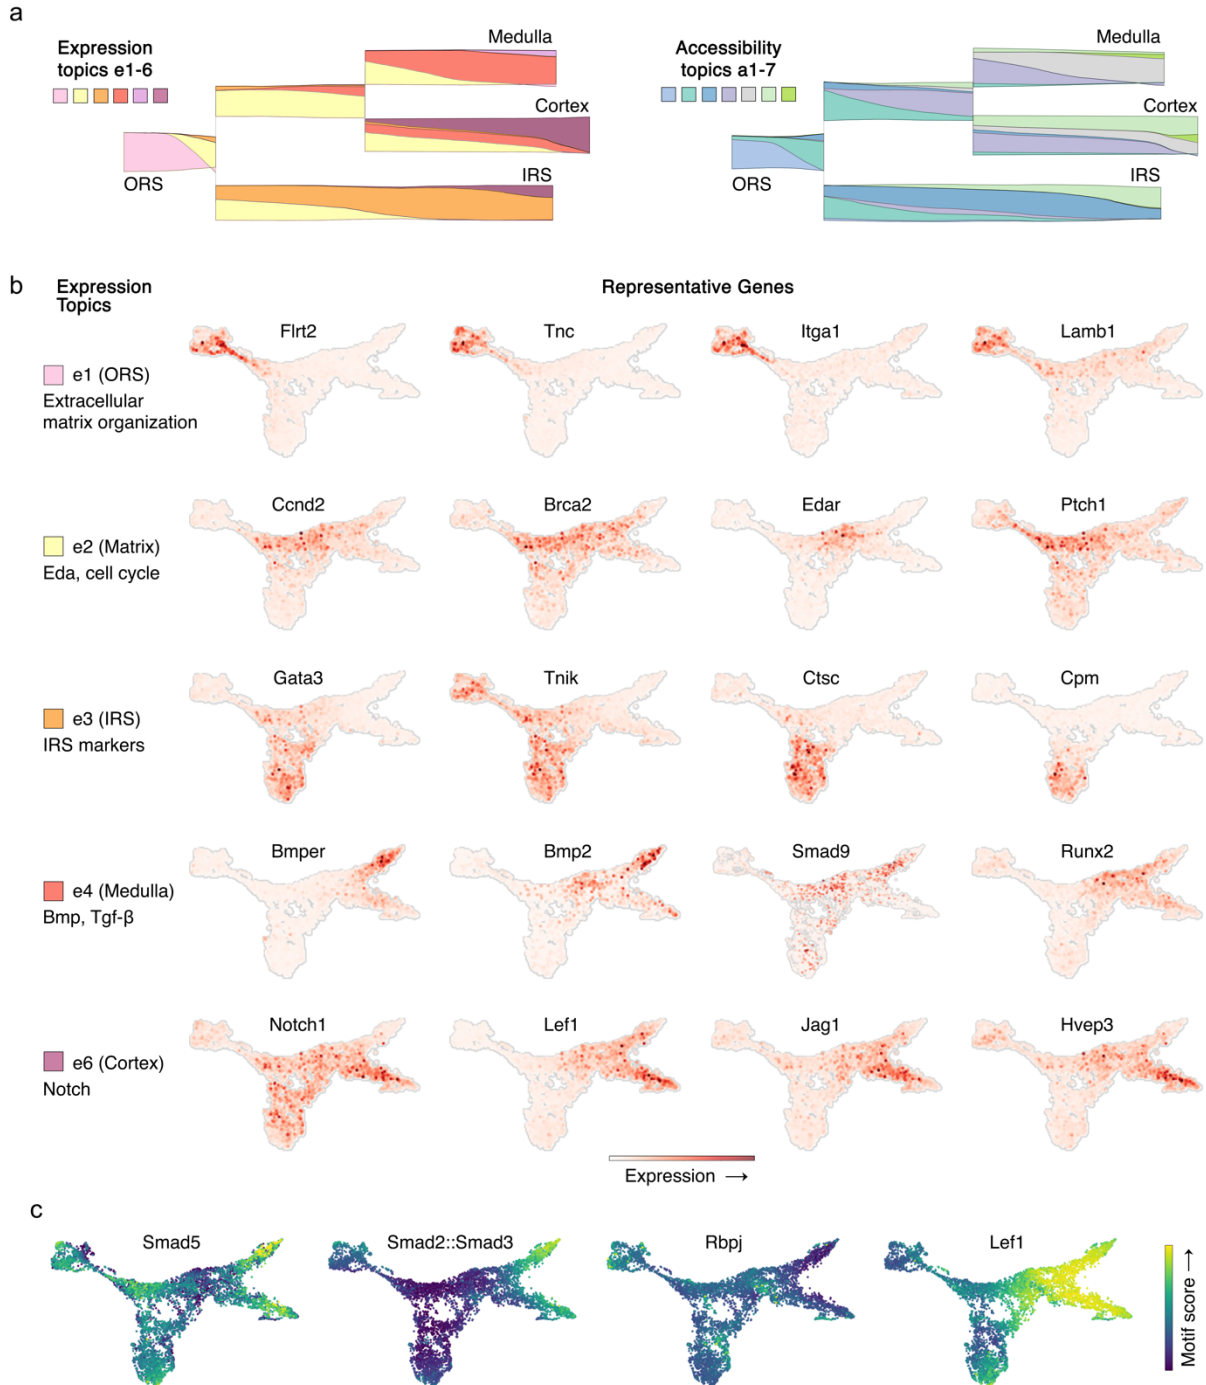

**Extended Data Fig. 4 | MIRA topics described gene modules activated in each lineage. a**, Stream graph of window-averaged cell-topic compositions starting from ORS cell state, progressing rightward through pseudotime (to facilitate visualization of all lineages concurrently, pseudotime scale is not log-transformed, unlike other presented stream graphs). **b**, MIRA joint topic representation colored by expression of genes highly activated in each of the indicated topics, which described the activated gene modules in each lineage. **c**, MIRA joint topic representation colored by indicated motif scores.

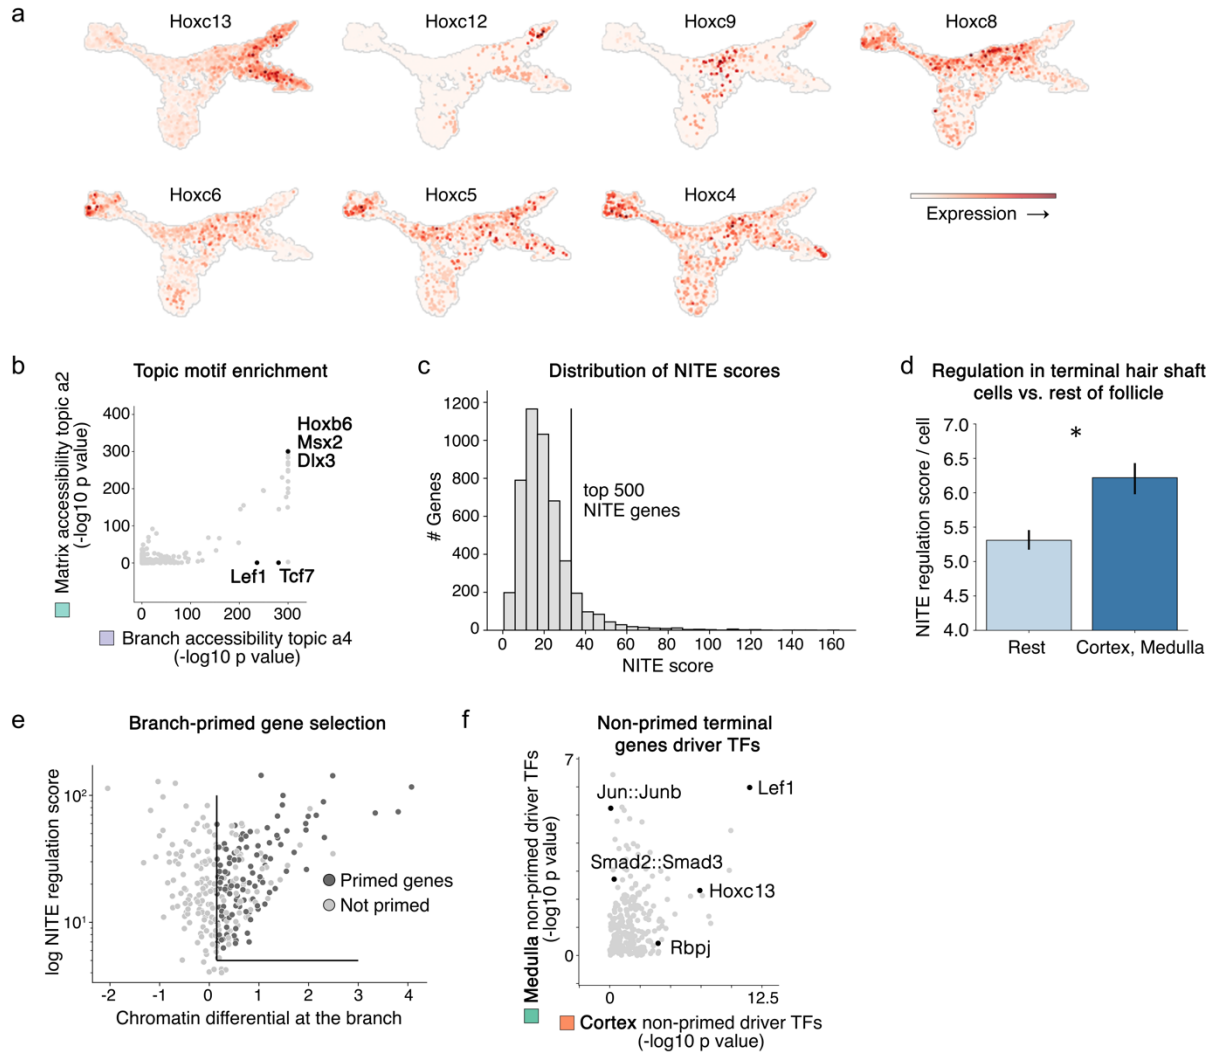

**Extended Data Fig. 5 | Terminal medulla and cortex cells showed significantly higher NITE regulation compared to cells earlier in hair follicle differentiation.** **a**, MIRA joint topic representation colored by expression of Hoxc genes, indicating that Hoxc motifs activated in both the medulla and cortex accessibility topics (a5 and a6, respectively) were most attributable to Hoxc13 based on its expression in these lineages. **b**, Comparison of motif enrichment in top peaks of preceding matrix versus subsequent branch accessibility topics (a2 and a4, respectively). While most motifs were shared between these topics, accessibility of Wnt signaling-related motifs uniquely arose at the branch. **c**, Distribution of NITE scores among genes expressed in the hair follicle. **d**, Medulla and cortex cells showed significantly more NITE regulation than other cells in the hair follicle (\* $p < 0.05$ , Wilcoxon rank-sum). **e**, Genes ultimately expressed in medulla or cortex that were primed at the branch were defined as those with a NITE regulation score above the indicated thresholds that had positive chromatin differential at the branch, indicating that expression was over-estimated based on local chromatin accessibility. Branch-primed genes must also be up-regulated in the downstream lineage relative to matrix cells. **f**, Driver transcription factor analysis of non-primed medulla versus cortex genes.

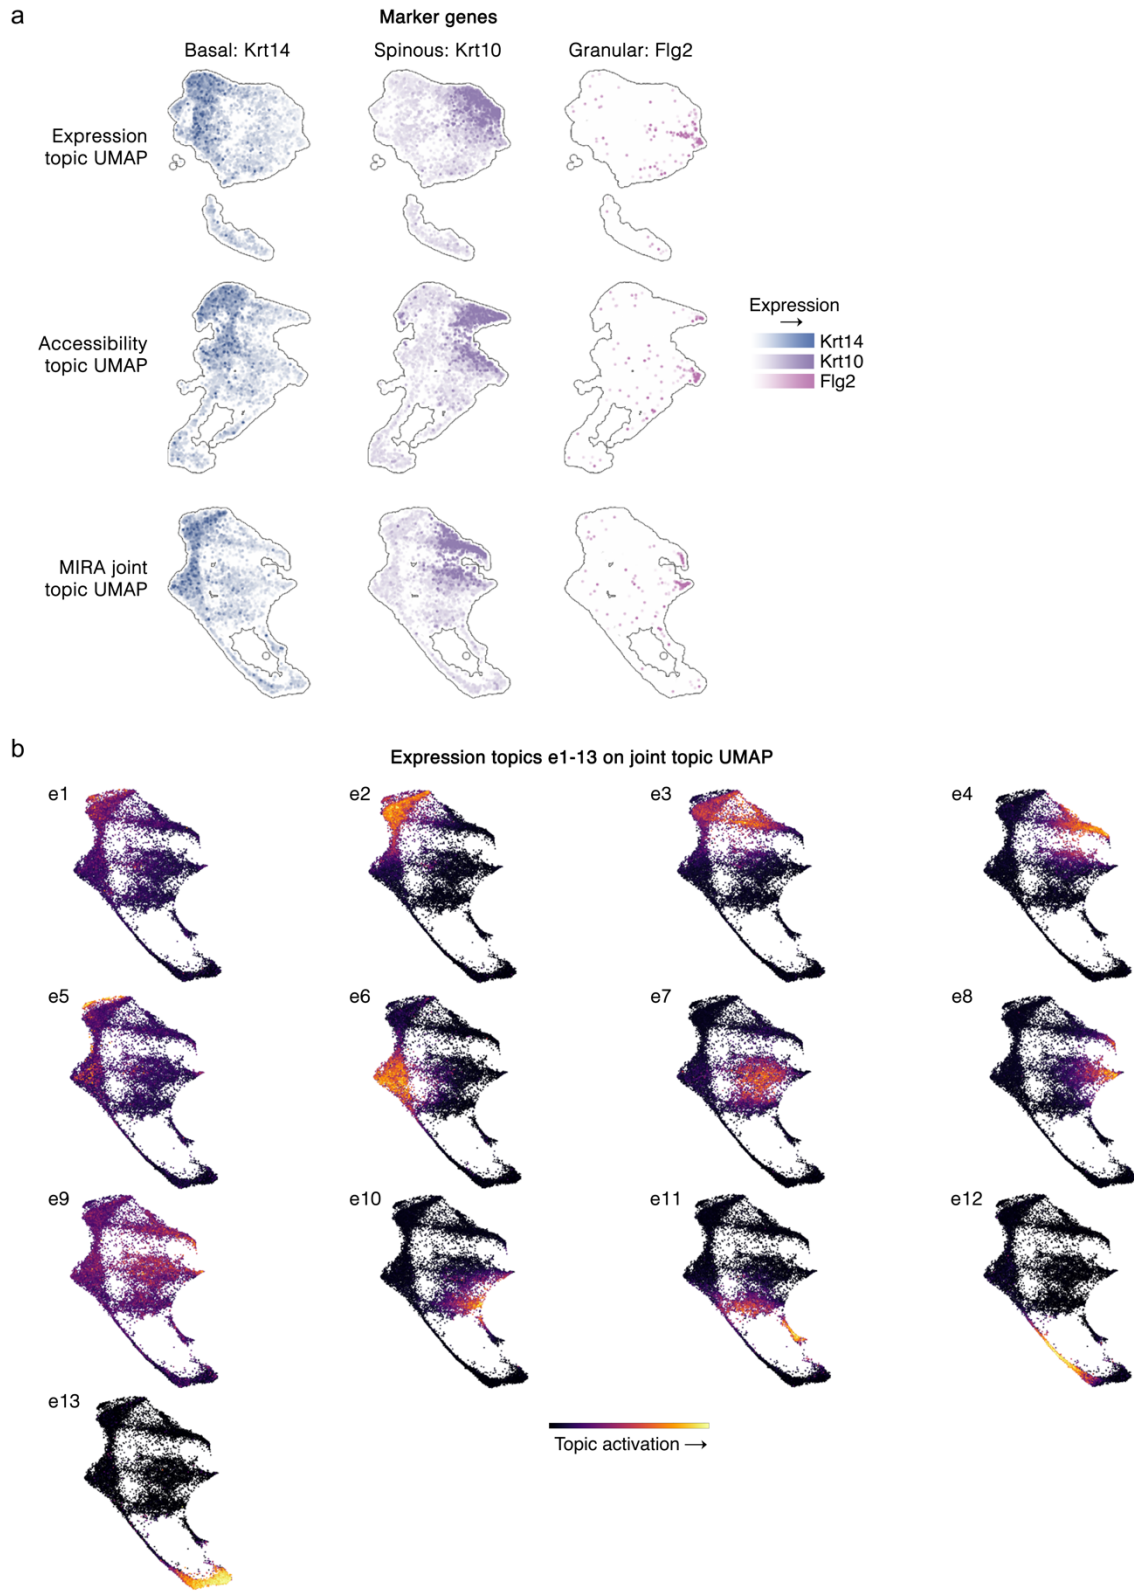

**Extended Data Fig. 6 | MIRA expression topics describing IFE cells captured shared and lineage-specific states. a,** Expression of marker genes of indicated lineages on MIRA expression, accessibility, and joint topic UMAPs. **b,** MIRA expression topics a1-13 on joint representation UMAP.

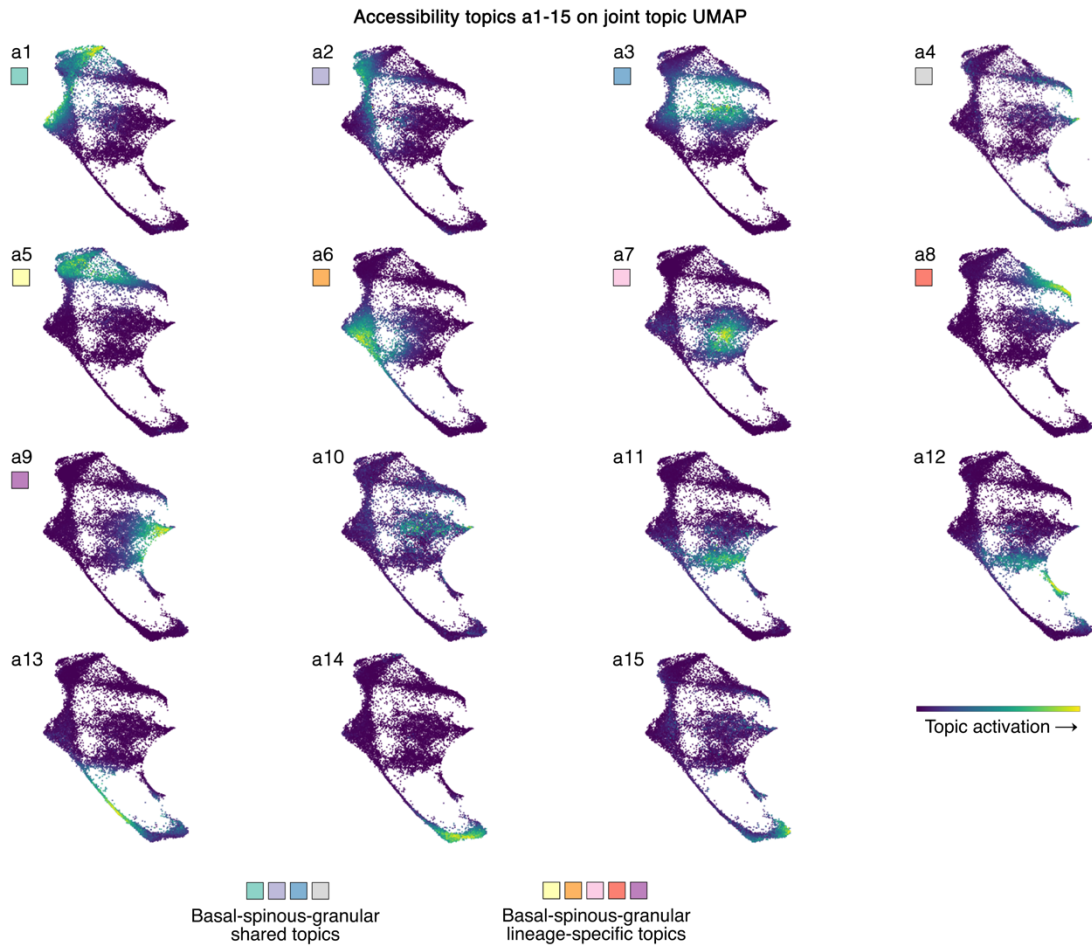

**Extended Data Fig. 7 | MIRA accessibility topics describing IFE cells captured shared and lineage-specific states.** MIRA accessibility topics a1-15 on joint representation UMAP. Colored boxes correspond to topics indicated in Fig. 5h, which are shared or lineage-specific within the basal-spinous-granular or intermediate basal-spinous-granular differentiation trajectories as annotated in Fig. 5a-b.



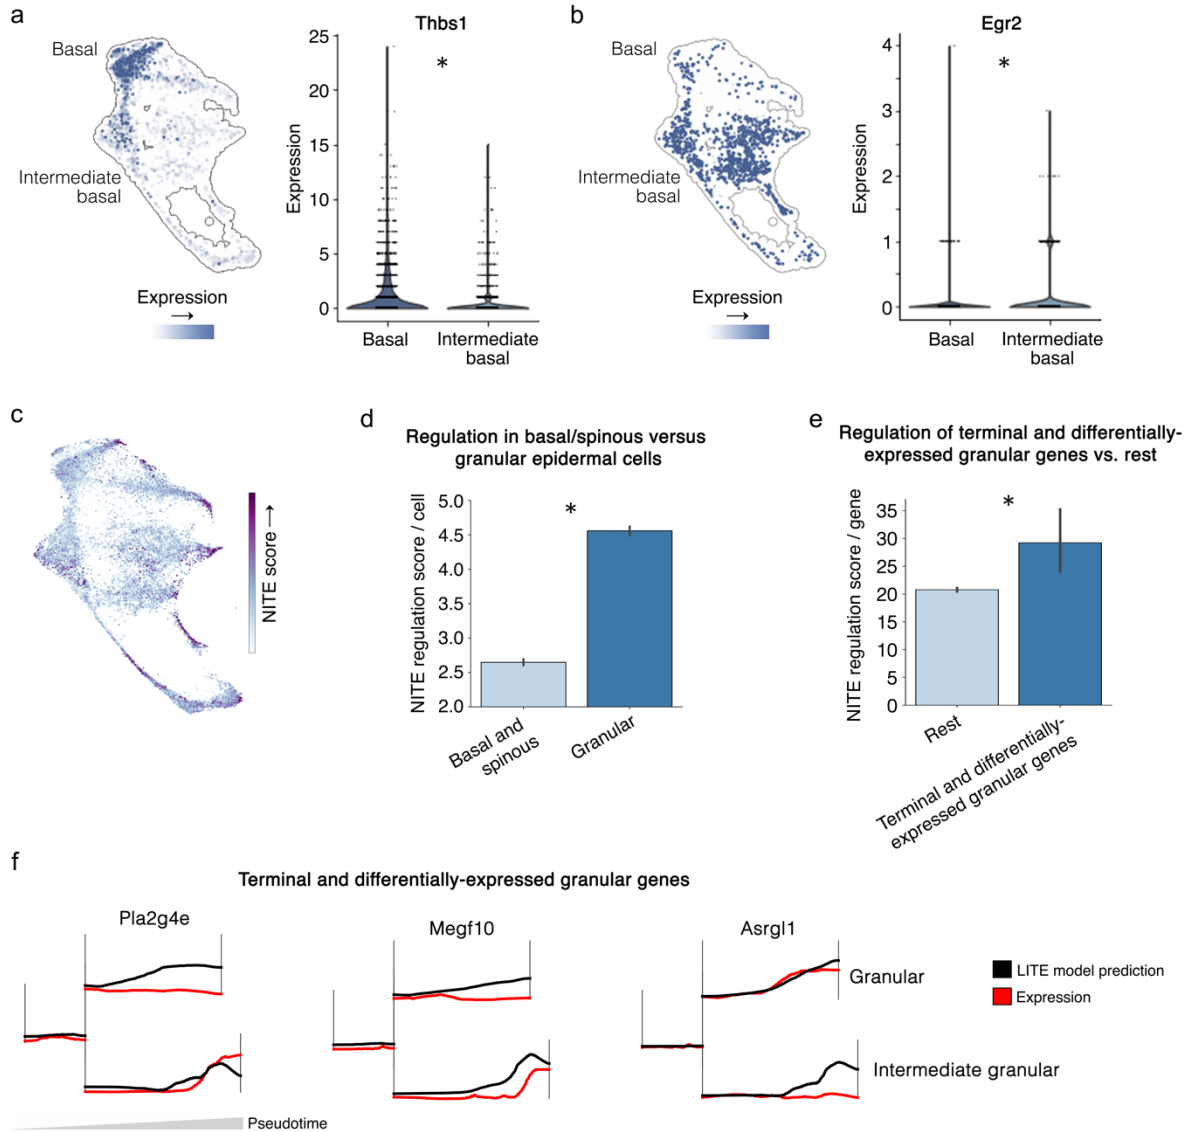

**Extended Data Fig. 8 | Terminal granular cells were enriched for NITE regulation.** **a**, *Thbs1* and **b**, *Egr2* expression distinguished basal cells distant from the hair follicle from those within the intermediate basal-spinous-granular trajectory near the hair follicle ( $*p < 0.05$ , Wilcoxon rank-sum, Benjamini-Hochberg corrected). **c**, NITE regulation score of each cell in the IFE. **d**, Terminal IFE granular cells showed significantly more NITE regulation than cells earlier in the differentiation trajectory (basal and spinous cells) ( $*p < 0.05$ , Wilcoxon rank-sum). **e**, Genes upregulated in granular cells that were differentially-expressed between granular populations had significantly higher NITE scores than other genes. **f**, Examples of terminally upregulated, differentially-expressed granular genes' local chromatin accessibility (LITE model prediction) and expression. Despite accessibility increasing in both lineages, expression only increased in one lineage.

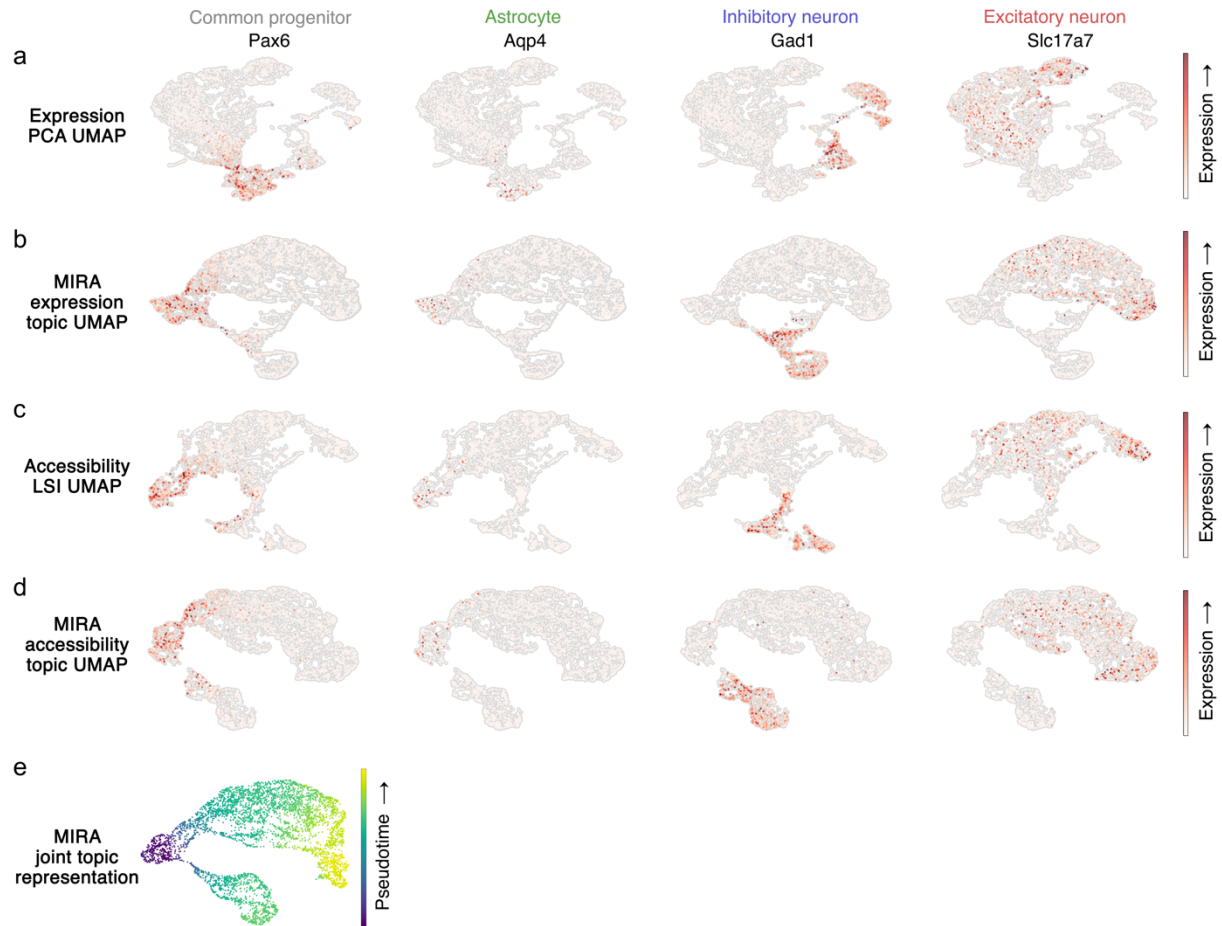

**Extended Data Fig. 9 | MIRA topics constructed a higher fidelity developmental trajectory of embryonic brain development compared to standard UMAPs.** Expression of marker genes for Pax6+ common progenitors and terminal states of astrocytes, excitatory neurons, or inhibitory neurons mapped on **a**, standard UMAP based on PCA of normalized expression (inhibitory neuron branch was disjointed), **b**, MIRA expression topic UMAP (inhibitory branch was more uniform but tail converged into excitatory neurons), **c**, standard UMAP based on LSI of accessible regions (common progenitors were disjointed, neuronal excitatory and inhibitory branches were aberrantly attached, and the inhibitory neuron branch was disjointed), or **d**, MIRA accessibility topic UMAP (common progenitors were unified, neuronal excitatory and inhibitory branches diverged as expected, and the inhibitory branch was more uniform but discontinuous from neuronal progenitors). In contrast to standard methods, the MIRA joint expression and accessibility topic representation most accurately reflected the developmental trajectory of these cell populations (Fig. 6a). **e**, MIRA joint expression and accessibility topic UMAP, colored by pseudotime of inferred trajectory.



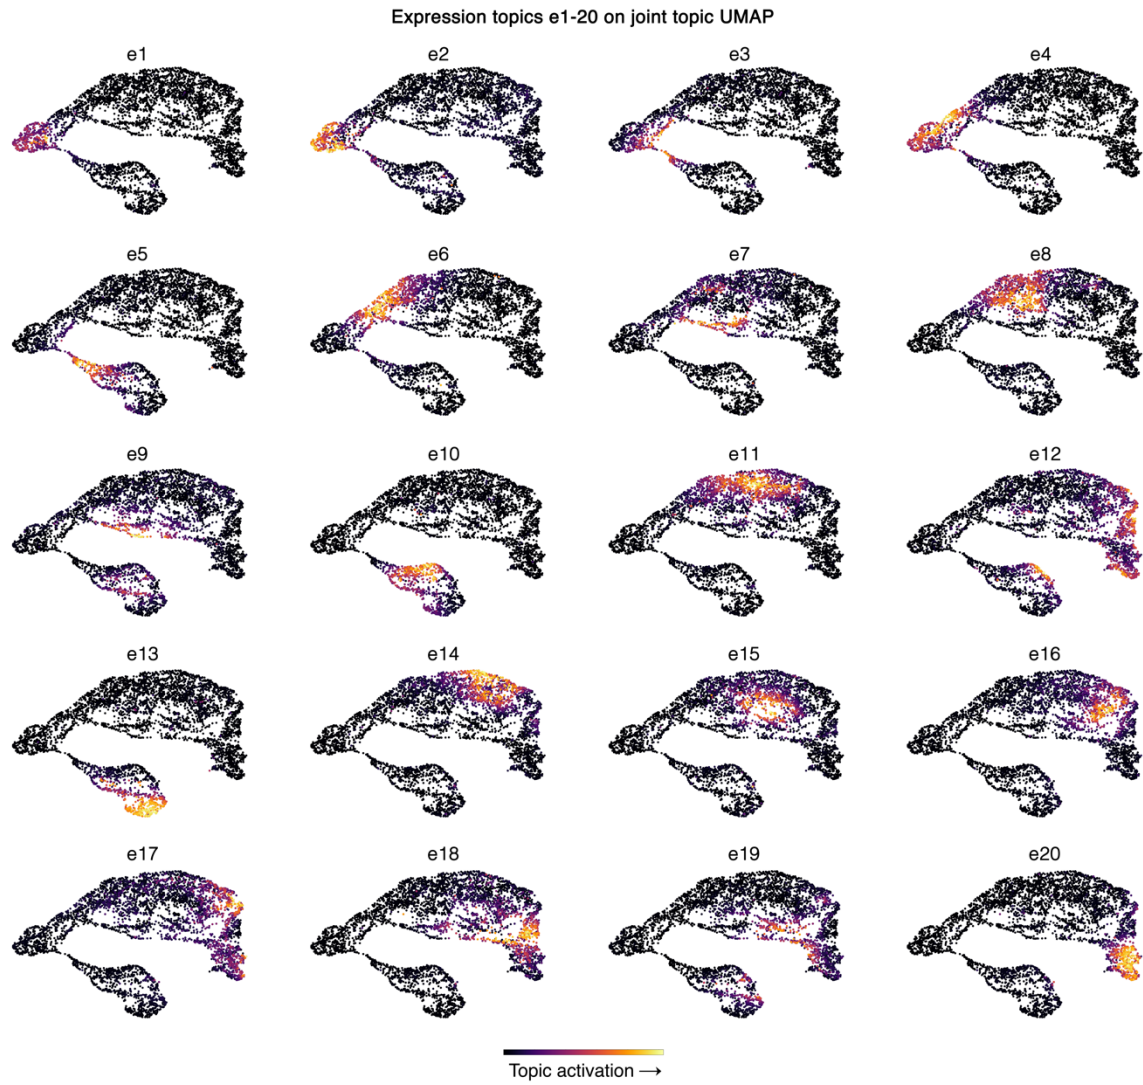

**Extended Data Fig. 10 | MIRA expression topics describing embryonic brain cells were sparse and nonredundant.** MIRA expression topics e1-20 on joint representation UMAP.

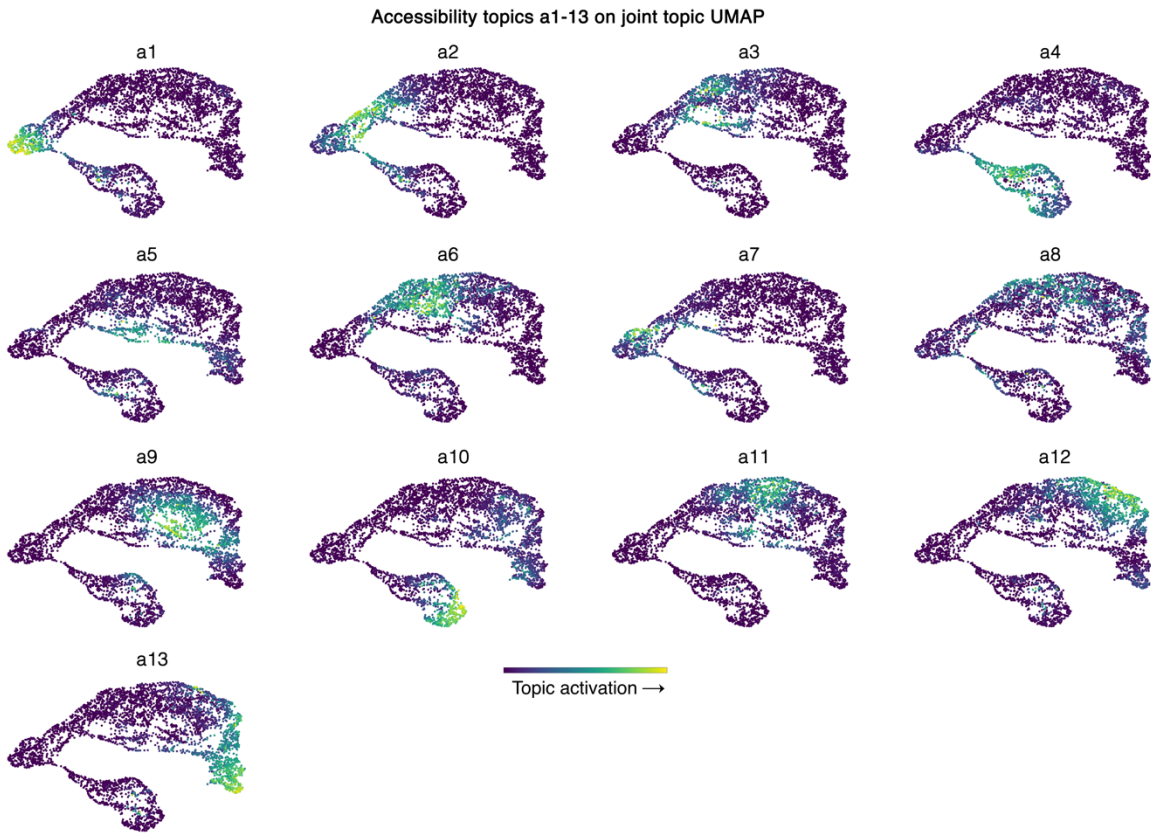

**Extended Data Fig. 11 | MIRA accessibility topics describing embryonic brain cells were sparse and nonredundant.** MIRA accessibility topics a1-13 on joint representation UMAP.

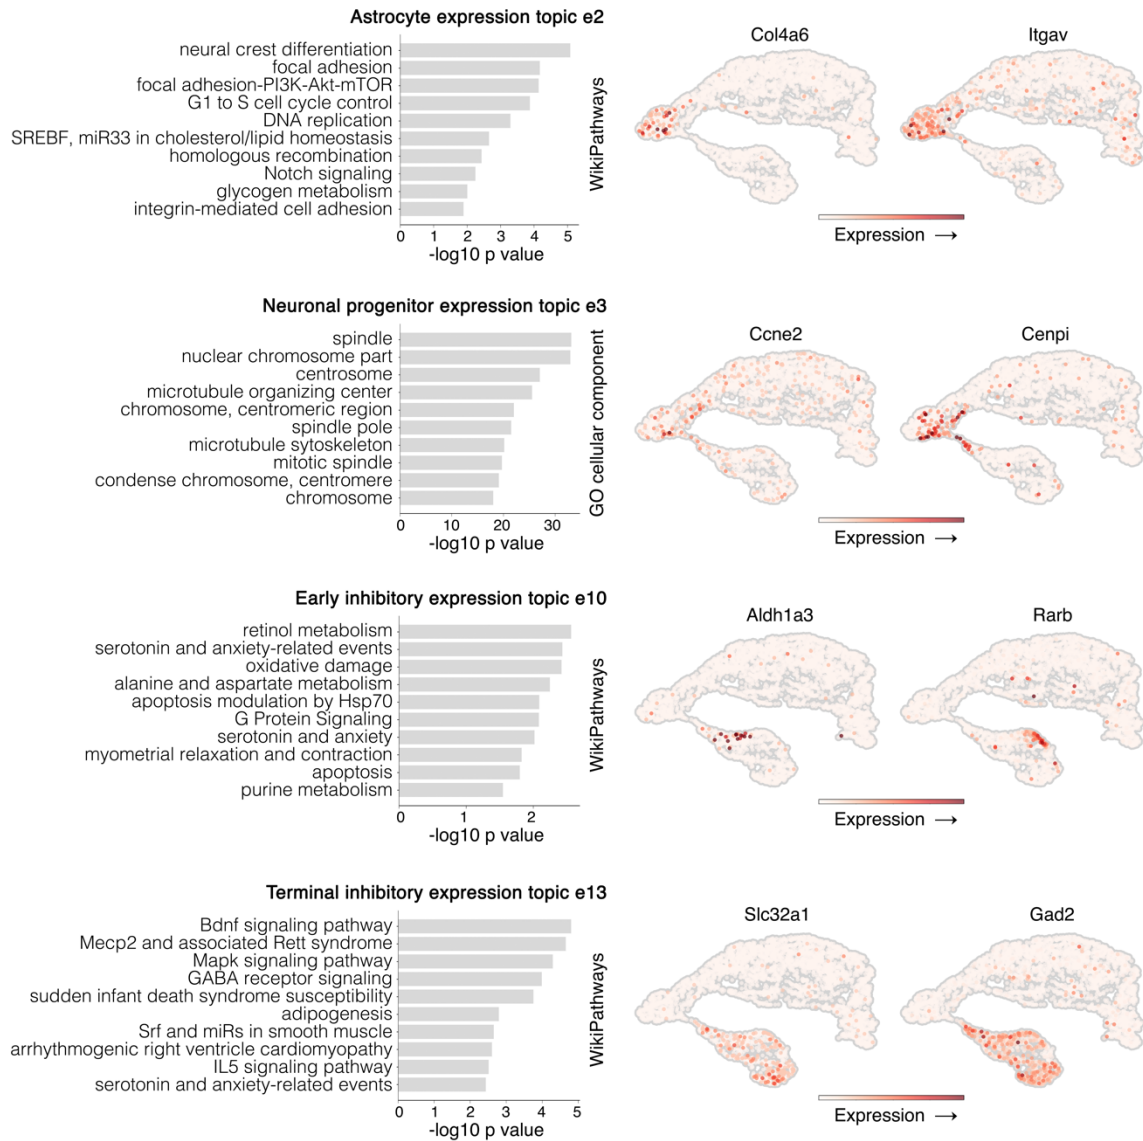

**Extended Data Fig. 12 | MIRA expression topics illuminated pathways key to each stage of differentiation in astrocytes, neuronal progenitors, and inhibitory neurons.** Pathway enrichment of MIRA expression topics describing astrocytes (focal adhesion), neuronal progenitors (proliferation), early inhibitory neurons (retinoic acid signaling), and terminal inhibitory neurons (Bdnf signaling, GABA receptors) (expression of example genes shown to the right).

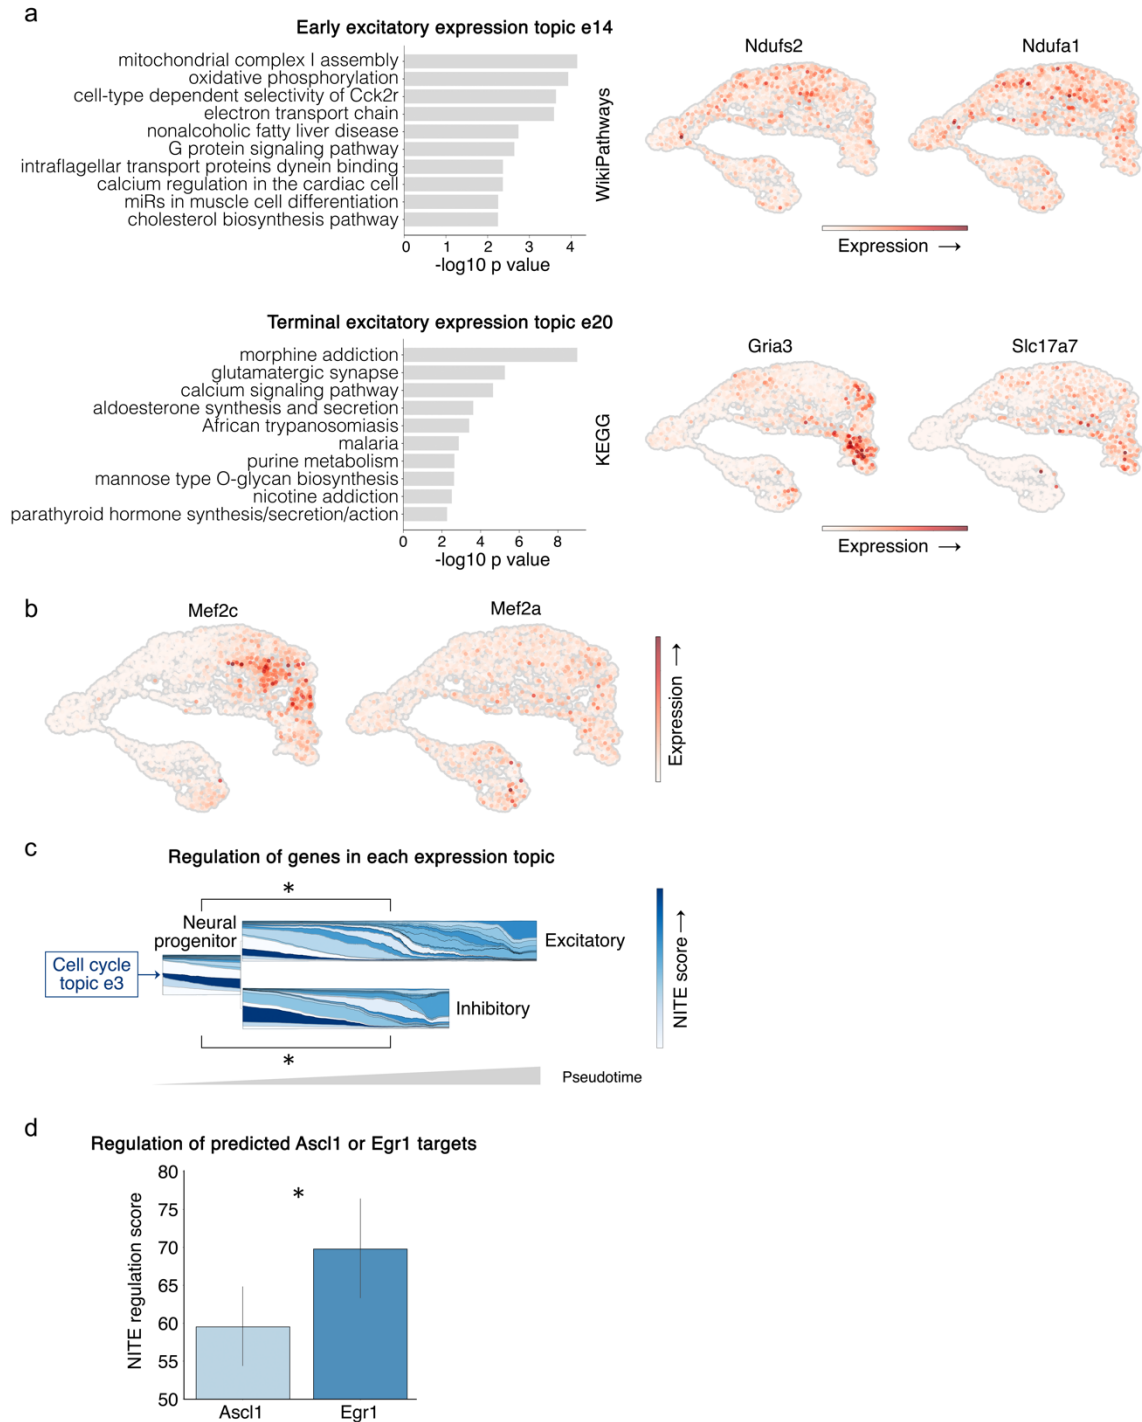

**Extended Data Fig. 13 | MIRA expression topics illuminated pathways key to each stage of differentiation in excitatory neurons. a,** Pathway enrichment of MIRA expression topics describing early excitatory (mitochondrial machinery) or terminal excitatory neurons (glutamatergic neurotransmission) (expression of example genes shown to the right). **b,** *Mef2c* was more highly expressed in excitatory neurons, indicating that Mef2 motifs enriched in the terminal excitatory neuron topic were likely attributable to Mef2c. **c,** Stream graphs of expression topics across pseudolineage trajectory colored by NITE versus LITE regulation of the top genes in each topic. Topics describing earlier states tended towards LITE regulation with the notable exception of topic e3, which is composed of cell cycle

genes that have been previously described to be regulated with minimal influence of local chromatin accessibility state<sup>3</sup>. Topics describing terminal states tended more towards NITE regulation, including the major terminal excitatory and inhibitory neuron topics that are composed of neurotransmitter genes. Overall, expression topics describing the neuronal progenitor state were significantly enriched for LITE regulation, whereas after commitment to either the excitatory or inhibitory fate, topics were significantly enriched for NITE regulation (\* $p < 0.05$ , Wilcoxon rank-sum, Benjamini-Hochberg corrected). **d**, Genes predicted by MIRA pISD modeling to be regulated by pioneer transcription factor *Ascl1* showed significantly more LITE regulation compared to genes predicted to be regulated by non-pioneer-like *Egr1* (\* $p < 0.05$ , Wilcoxon rank-sum).

## Extended Methods

### MIRA Input Data

The input data for MIRA is expression (raw gene count) and accessibility (binary peak count) matrices from multimodal RNA-sequencing (scRNA-seq) and Assay for Transposase-Accessible Chromatin-sequencing (scATAC-seq) in the same single cells.

### MIRA Topic Model

#### *Model architecture*

The MIRA topic model is a generative probabilistic model where the cell's observed features (transcript counts or accessible genomic intervals) are explained by hidden latent variables. Inspired by topic modeling methods such as Latent Dirichlet Allocation (LDA)<sup>1</sup>, we assume that the latent variables describing a cell's state are sparse and compositional. As such, only a few latent variables are active at a time to define each state, and that the latent variables relate linearly to changes in the cell's observed attributes. This constrains the model such that the latent variables decompose expression and accessibility into coherent, interpretable patterns of covarying features. Each latent variable thereby describes a "topic" of coregulated genes or co-accessible genomic loci, and suggests that the genes and loci influenced by that topic share some underlying facet of regulation.

MIRA uses a variational autoencoding neural network<sup>2</sup> (Extended Data Fig. 1) to discover latent topics from expression or accessibility data, which enables faster and more flexible inference than classic Gibbs sampling-based solutions like LDA<sup>3</sup>. The central part of the model is the same for expression and accessibility data, although the numbers of topics may differ. The input data is either a gene counts matrix for expression data or a binary peak-count matrix for accessibility data. From either of these inputs, the topic model learns a latent representation for cells  $Z \in I^{N_{\text{cells}} \times N_{\text{topics}}}$  where  $I$  is the unit interval  $[0, 1]$  and where:

$$\sum_{t=1}^{N_{\text{topics}}} Z_{it} = 1, \forall i \in \{1, \dots, N_{\text{cells}}\}$$

For matrices  $M_{xy}$ , let the notation  $M_{x\cdot}$  indicate the matrix row indexed by  $x$  and  $M_{\cdot y}$  indicate the matrix column indexed by  $y$ . We specify a sampling procedure such that  $Z_{i\cdot} \in I^{N_{\text{topics}}}$  is Dirichlet-distributed with a hierarchical prior controlling the pseudocounts allotted to each topic:

$$Z_{i\cdot} \sim \text{Dirichlet}(\alpha_1, \dots, \alpha_{N_{\text{topics}}}), \forall i \in \{1, \dots, N_{\text{cells}}\}$$

$$\alpha_t \sim \text{Gamma}(2, \frac{2N_{\text{topics}}}{J}), \forall t \in \{1, \dots, N_{\text{topics}}\}$$

where  $J$  is the initial pseudocount allotted to the Dirichlet distribution, and  $\alpha$  is the random variable controlling the sparsity of  $Z$ . The gamma hyperprior, parameterized as (shape, rate), controls the sparsity of each topic, allowing for the data-driven tuning of sparsity to fit different

patterns and modalities. Density of the gamma hyperprior is concentrated below the mean at  $J/N_{\text{topics}}$ , prioritizing the capture of very sparse topics but still enabling flexibility.

The latent representation of each cell represents the composition of topics that describe the expression or accessibility observations measured from that cell. We adapt the generative process of the model to account for the distinct statistical properties of each modality<sup>4,5</sup>. We denote the gene expression data matrix as  $X^{\text{RNA}} \in \mathbb{Z}_{\geq 0}^{N_{\text{cells}} \times N_{\text{genes}}}$ , and specify a model such that each observation is independently drawn from the following generative process:

$$X_{ij}^{\text{RNA}} \sim \text{NegativeBinomial}(n_i \rho_{ij}, \theta_j), \forall i \in \{1, \dots, N_{\text{cells}}\}, \forall j \in \{1, \dots, N_{\text{genes}}\}$$

$$\rho_i = \text{softmax}(\text{batchnorm}(Z_i \beta)), \forall i \in \{1, \dots, N_{\text{cells}}\}$$

$$n_i \sim \text{LogNormal}(\log \hat{n}_i^{\text{RNA}}, 1), \forall i \in \{1, \dots, N_{\text{cells}}\}$$

$$\hat{n}_i^{\text{RNA}} = \sum_{j=1}^{N_{\text{genes}}} X_{ij}^{\text{RNA}}, \forall i \in \{1, \dots, N_{\text{cells}}\}$$

where  $\rho \in \mathbb{I}^{N_{\text{cells}} \times N_{\text{genes}}}$  is the predicted composition of expression across all genes in each cell and  $\sum_{j=1}^{N_{\text{genes}}} \rho_{ij} = 1, \forall i \in \{1, \dots, N_{\text{cells}}\}$ ;  $\beta$  is the  $\mathbb{R}^{N_{\text{topics}} \times N_{\text{genes}}}$  matrix linking gene expression to the influence of topics; and  $n_i$  is the effective read depth of cell  $i$ .  $\theta \in \mathbb{R}_{\geq 0}^{N_{\text{genes}}}$  is a global variable determining the overdispersion of the negative binomial distribution for each gene across all cells.

For chromatin accessibility data, we model observations of accessibility  $X^{\text{ATAC}} \in \{0,1\}^{N_{\text{cells}} \times N_{\text{peaks}}}$  across all regions given a cell using the multinomial distribution:

$$X_i^{\text{ATAC}} \sim \text{Multinomial}(\rho_i, \hat{n}_i^{\text{ATAC}}), \forall i \in \{1, \dots, N_{\text{cells}}\}$$

$$\rho_i = \text{softmax}(\text{batchnorm}(Z_i \beta)), \forall i \in \{1, \dots, N_{\text{cells}}\}$$

$$\hat{n}_i^{\text{ATAC}} = \sum_{k=1}^{N_{\text{peaks}}} X_{ik}^{\text{ATAC}}, \forall i \in \{1, \dots, N_{\text{cells}}\}$$

where  $\rho \in \mathbb{I}^{N_{\text{cells}} \times N_{\text{peaks}}}$  is the predicted composition of accessibility across all regions in each cell;  $\beta$  is the  $\mathbb{R}^{N_{\text{topics}} \times N_{\text{peaks}}}$  matrix linking accessibility to the influence of topics; and  $\hat{n}_i^{\text{ATAC}}$  is the observed number of accessible peaks in cell  $i$ . Thus, accessibility in a cell is generated by  $\hat{n}_i^{\text{ATAC}}$  independent samples from the categorical distribution over regions. This is the same assumption underlying the generative process of sparse wordcount compositions in a document used in natural language topic modeling. The likelihood function of the multinomial distribution given observed data  $X_i^{\text{ATAC}}$  and region composition  $\rho_i$  does not depend on the read depth parameter, so we do not learn a variable for effective scATAC-seq read depth.

For both modalities, MIRA takes  $\rho_i$  to be the imputed value of the features, representing its estimated rate of occurrence relative to other features (genes or regions) in the same cell.

Notably,  $\rho_i$  does not depend on the read depth of a cell, enabling normalized comparisons of feature magnitude across cells with heterogenous capture rates.

MIRA applies batch normalization<sup>6</sup> to the activation of each gene or accessible region given the latent topics of a cell,  $Z_i \cdot \beta_j$  or  $Z_i \cdot \beta_k$ , respectively. For genes  $j$  (or congruently peaks  $k$ ), batch normalization standardizes that activation using summary statistics tracked from previous activation scores across many cells, the batch mean  $\mu_j^{\text{bn}}$  and batch standard deviation  $\sigma_j^{\text{bn}}$ , then projects that quantity to the mean,  $b_j$ , and standard deviation,  $\gamma_j$ , of that feature's space:

$$\text{batchnorm}(Z_i \cdot \beta_j) = \gamma_j \left( \frac{Z_i \cdot \beta_j - \mu_j^{\text{bn}}}{\sigma_j^{\text{bn}}} \right) + b_j$$

This normalizes the topic-feature matrix  $\beta$  such that the topic-feature activation strengths are dependent on the strength of association and decoupled from the mean variance of the feature counts. This is critical to the analysis of the topics so that the most activated features correspond with the strongest associations rather than the most highly expressed genes or most accessible loci.

#### *Stochastic variational inference*

Given the observations from cells,  $X^{\text{RNA}}$  or  $X^{\text{ATAC}}$  as  $X$ , MIRA finds topics  $\beta$ ; feature means and variances,  $\gamma$  and  $b$ ; dispersions  $\theta$  (only for expression data); as well as cell-level latent representations  $Z$ , such that the probability of observing the data is maximized given those parameters  $\vartheta$  and conditioned on the latent space:

$$\begin{aligned} \vartheta_{\max} &= \text{argmax}_{\vartheta} \log p_{\vartheta}(X) \\ p_{\vartheta}(X) &= \int p_{\vartheta}(X | Z) p_{\vartheta}(Z) dZ \\ \vartheta &= (\beta, \gamma, b, \theta) \end{aligned}$$

The integral for the marginal likelihood of the model is intractable, so the values of the parameters cannot be solved analytically. Instead of using Monte Carlo sampling-based methods, MIRA employs the variational autoencoder approach<sup>2</sup> which is based on a variational approximation of the distribution  $p_{\vartheta}(Z | X)$ , and the observation that the marginal distribution is related to the posterior predictive distribution of  $Z$  by Bayes rule.

The variational distribution  $q$ , conditioned on the observations  $X$ , is represented by an encoder neural network with weights  $\phi$ :

$$\begin{aligned} q_{\phi}(Z | X) &\approx p_{\vartheta}(Z | X) \\ Z &\sim q_{\phi}(Z | X) = \text{Encoder}_{\phi}(X) \end{aligned}$$



to approximate the marginal likelihood of the model. The encoder neural network uses the observations of  $X$  to parameterize the distribution from which  $Z$  is sampled. MIRA provides the generative model and its parameters  $\vartheta$ , and the variational sampling method and its parameters  $\phi$ , to Pyro's stochastic variational inference function<sup>7</sup>. Pyro then jointly estimates the parameter values by maximizing the evidence lower bound (ELBO) objective<sup>3</sup> using stochastic gradient ascent, which maximizes the probability of the observed data given the variational approximation  $q_\phi(Z | X)$ , while minimizing the Kullback-Leibler (KL) divergence between variational distribution  $q_\phi(Z | X)$  and the prior distribution  $p_\vartheta(Z)$ . We assume the latent variables are independent, which satisfies Pyro's mean field condition and enables Pyro's use of analytical expressions for KL divergence. During inference, Pyro learns point estimates for all parameters  $\vartheta$  and  $\phi$ .

### Variational reparameterization

To train the variational parameters of the model using gradient ascent, MIRA reparameterizes the latent variable sampling scheme in terms of normal distributions, enabling Pyro to find unbiased Monte Carlo estimates of the ELBO expectation's gradient<sup>2</sup>. MIRA recasts the Dirichlet prior as implemented by ProdLDA<sup>8</sup>:

$$Z_{i.} \sim \text{softmax}(\text{Normal}(\mu^Z, \text{diag}((\sigma^Z)^2))) \approx \text{Dirichlet}(\alpha_1, \dots, \alpha_{N_{\text{topics}}}), \forall i \in \{1, \dots, N_{\text{cells}}\}$$

$$\mu_t^Z = \log \alpha_t - \frac{1}{N_{\text{topics}}} \sum_{\tau=1}^{N_{\text{topics}}} \log \alpha_\tau, \forall t \in \{1, \dots, N_{\text{topics}}\}$$

$$(\sigma_t^Z)^2 = \frac{1}{\alpha_t} \left(1 - \frac{2}{N_{\text{topics}}}\right) + \frac{1}{N_{\text{topics}} \alpha_t}, \forall t \in \{1, \dots, N_{\text{topics}}\}$$

$$\alpha_t \sim \text{LogNormal}(\alpha_\mu, \alpha_\sigma^2) \approx \text{Gamma}(2, \frac{2N_{\text{topics}}}{j}), \forall t \in \{1, \dots, N_{\text{topics}}\}$$

$$\alpha_\mu = \log \frac{j}{\sqrt{\frac{3}{2} N_{\text{topics}}}}, \quad \alpha_\sigma^2 = \log \frac{3}{2}$$

The  $\alpha_\mu$  and  $\alpha_\sigma$  parameters specify a log-normal distribution with the same mean and variance as the generative gamma distribution, and softmax of samples from the normal distribution parameterized by  $\mu_t^Z$  and  $\sigma_t^Z$  approximates the Dirichlet prior over topics. Using the output layer of the encoder neural network (see MIRA Topic Model: *Stochastic variational inference* section) conditioned on the observations from the cell, MIRA defines the variational distributions of the latent topics for each cell:

$$v_{i.}^{\text{output}} = \text{Encoder}_\phi(X_{i.})$$

$$\mu_{i.} = (v_{i1}^{\text{output}}, \dots, v_{iN_{\text{topics}}}^{\text{output}})$$

$$\sigma_i = \text{softplus} \circ (v_{i,(N_{\text{topics}}+1)}^{\text{output}}, \dots, v_{i,(2N_{\text{topics}})}^{\text{output}})$$

For expression model only:

$$\mu_i^{n_i} = v_{i,(2N_{\text{topics}}+1)}^{\text{output}}$$

$$\sigma_i^{n_i} = \text{softplus}(v_{i,(2N_{\text{topics}}+2)}^{\text{output}})$$

For cell  $i$ , the neural network output  $v_i^{\text{output}} \in \mathbb{R}$  gives a  $(2N_{\text{topics}} + 2)$ -dimensional vector for expression or a  $2N_{\text{topics}}$ -dimensional vector for accessibility, which provides estimates of the mean  $\mu_i \in \mathbb{R}^{N_{\text{topics}}}$  and standard deviation  $\sigma_i \in \mathbb{R}^{N_{\text{topics}}}$  parameters for the variational distribution of  $Z_i$  for that cell. For expression data, the encoder network also parameterizes the distribution of effective read depth  $n_i \sim \text{LogNormal}(\mu_i^{n_i}, (\sigma_i^{n_i})^2)$ . When specifying standard deviation parameters for the variational distribution, we found the non-negative softplus transformation<sup>9</sup> to be more numerically stable than the exponential transformation. Above,  $\circ$  refers to the composition of the softplus function over the vector output of the encoder network.

#### *Encoder network architecture*

The encoder neural network takes the observations of a given modality as features and outputs a parameterization for the latent representation for the cell. MIRA adapts the architecture of the encoder neural network to fit the properties of that modality. For gene expression data, MIRA first transforms raw count observations to normalized quantities using deviance residual featurization<sup>10</sup> of highly variable genes, which are then passed through the neural network. The deviance residuals  $r_{ij}$  of the raw counts  $X_{ij}^{\text{RNA}}$  regress out the effects of count variation and circumvent count distortions induced by traditional log-plus-one featurization of expression count data, providing a better initial representation of cell state for decomposition into topics by the encoder network.

MIRA passes the deviance residuals through two hidden layers of a feed-forward neural network and an output layer. Each layer consists of a fully-connected layer, batch normalization, ReLU activation<sup>11</sup>, then dropout<sup>12</sup>. The hidden layers have 128 nodes. Thus, the encoder network conditioned on expression of cell  $i$  is given by:

$$f^l(v) = \text{dropout}(\text{ReLU}(\text{batchnorm}(W^l v + b^l)))$$

$$\begin{aligned} r_i &= \text{DevianceResiduals}(X_i^{\text{RNA}}) \\ v_i^0 &= f^0(r_i \oplus \log \hat{n}_i^{\text{RNA}}) \\ v_i^1 &= f^1(v_i^0) \\ v_i^{\text{output}} &= \text{batchnorm}(W^2 v_i^1 + b^2) \end{aligned}$$

where  $f^l$  is the function of the  $l^{\text{th}}$  layer of the encoder network,  $W^l$  and  $b^l$  are the weights associated with that layer, and  $v_i^l \in \mathbb{R}^{N_{\text{nodes}}}$  is the output of the  $l^{\text{th}}$  layer for the  $i^{\text{th}}$  cell. The

output layer of the encoder network specifies parameters  $v_i^{\text{output}}$  for the latent variational distribution (see MIRA topic model, *Variational reparameterization* section) and is not subject to ReLU nonlinearity or dropout. We inject the observed read depth of the cell  $\hat{n}_i^{\text{RNA}}$  into the first feed-forward layer of the neural network by concatenating it ( $\oplus$ ) to the deviance residual features.

The encoder network for chromatin accessibility data requires a different model architecture due to the large number of peaks with high degree of sparsity. MIRA uses a Deep Averaging Network (DAN)<sup>13</sup>, which averages embedding vectors of all features found in the sample before passing that resultant vector through successive feed-forward layers. Applied to accessibility data, each site is associated with a 128-dimensional vector, and those vectors are averaged for every accessible site in a cell. The averaged vector passes through a hidden layer of the same specification as the expression encoder, then an output layer. The output of the DAN network for cell  $i$  is given by:

$$\begin{aligned} v_i^0 &= \frac{1}{|\Omega_i|} \sum_{k \in \Omega_i} W_k^0 \\ v_i^1 &= f_1(v_i^0 \oplus \log \hat{n}_i^{\text{ATAC}}) \\ v_i^{\text{output}} &= \text{batchnorm}(W^2 v_i^1 + b^2) \end{aligned}$$

where  $W_k^0 \in \mathbb{R}^{N_{\text{nodes}}}$  denotes the embeddings for each peak, and  $v_i^0$  is the average of the embedding vectors in  $\Omega_i$ , which is the set of accessible peaks  $X_{ik}^{\text{ATAC}}$  in the cell  $i$  regularized by leaving out peaks at a rate given by Bernoulli trials with parameter  $d$ . Again, we inject the read depth of the cell  $\hat{n}_i^{\text{ATAC}}$  into the first feed-forward layer of the neural network.

#### *Feature selection and training procedure*

To increase training speed, the number of input features used by the encoder can be limited by selecting highly variable genes in expression data and optionally randomly down-sampling peaks in ATAC-seq data for samples with a large number (>200,000) of peaks. On the other hand, topic enrichments may be more relevant when including additional genes and peaks that may not have met arbitrary feature selection cutoffs. For this reason, MIRA topic models may learn patterns in a superset of features while only utilizing a subset as features for the encoder network.

MIRA maximizes the ELBO objective by gradient ascent using the ADAM optimizer<sup>14</sup>. We adapt the learning rate of the optimizer during training using the one-cycle learning rate policy<sup>15</sup>. In two phases, the learning rate starts small and peaks one-third of the way through training, then slowly diminishes over the remainder of training. We set the initial and maximum learning rates using the learning rate range test<sup>15</sup>.

To prevent node collapse (when topics settle into insurmountable local minima early in training) we employ KL annealing of the ELBO objective<sup>16</sup> (see MIRA Topic Model: *Stochastic variational inference* section). The KL term exerts a strong regularizing influence through the prior  $p_\theta(Z)$ , which can dominate the gradient early in training and reduce expressivity of the model. Initially, the KL term weight is set to zero and increases linearly until plateauing at one, which occurs half-way through training.

### *Hyperparameter optimization*

MIRA includes a rigorous hyperparameter tuning scheme to ensure the model captures informative, non-redundant topics in the data. The most influential parameter on downstream analysis is  $N_{\text{topics}}$ , the number of topics, which is tuned along with  $\varepsilon$ , the smoothing parameter for the ADAM optimizer steps, the dropout rate of the encoder neural network, batch size, and the number of epochs trained. We evaluate a given specification of the model using the negative ELBO as the loss on a held-out set of cells. Empirically, the model loss appears to be stochastically convex and separable with respect to each of these parameters, meaning they may be jointly tuned using zero-order optimization of the model loss with respect to the hyperparameter values to approach the most optimal model for a given dataset.

For each iteration of hyperparameter optimization, MIRA uses a Tree of Parzen estimator<sup>17</sup> (TPE) implemented by Optuna<sup>18</sup> to suggest a new combination of hyperparameters that may improve on the previous best model. TPE is a Bayesian method for hyperparameter selection that uses pre-defined priors over the parameter space and evidence from previous trials to inform the next suggested hyperparameter combination.

To evaluate a set of hyperparameters recommended by TPE, MIRA performs five-fold cross-validation on a training set of cells and reports the average loss across all folds. To prevent excessive time spent on poorly performing models, each fold's loss is compared to previous trials, and the trial is terminated early if the current iteration's model does not meet the criteria of a successive halving bandit<sup>19</sup> with a reduction factor of three. The scores of early-terminated trials are penalized by the addition of a trial penalty factor,  $P$ , to the average loss:

$$P = P_0 2^{1-n}$$

where  $n \in \{1, \dots, 4\}$  is the cross-validation fold at the point of early termination. The penalty decreases for each fold tested and encourages TPE to explore the parameter spaces of trials that survived for more folds. Tuning may be run for a set number of iterations, 32 for large datasets with lower variance model performance estimates or 75 for small datasets, or until TPE converges and repeatedly suggests a similar number of topics.

After the tuning phase, the top five models are trained on the entire training set of cells, and performance compared on a held-out test set of cells. The best performing model from this phase is selected as the final model of the data and retrained on all available cells. MIRA repeats these optimization steps for each modality.

### *Topic Analysis*

Given a trained topic model, the  $\beta$  matrix encodes the linear associations between topics and expression or accessibility features. To get the normalized activation  $\psi_{tj} \in \mathbb{R}$  of a gene  $j$  (or congruently peak  $k$ ) given topic  $t$ , we scale the value of the  $\beta$  matrix using the learned batch normalization function's feature-specific variance and bias parameters:

$$\psi_{tj} = \text{sign}(\gamma_j) \frac{\beta_{tj} - \mu_j^{\text{bn}}}{\sigma_j^{\text{bn}}}$$

The distribution of activations across all genes and topics is roughly standard normal and is not skewed by the variance and mean levels of the feature. The top  $n$  features most strongly associated with a topic are given by the top  $n$  activation scores.

To annotate expression topics, MIRA extracts the top  $n$  genes and passes the geneset to Enrichr<sup>20</sup> for comparison to precompiled ontologies. To annotate accessibility topics, MIRA extracts the top  $c$  percentile of most activated peaks in a topic, then finds transcription factors (TFs) with predicted binding sites (by either motif analysis as described below or occupancy if provided chromatin immunoprecipitation-sequencing (ChIP-seq) data) enriched in the most activated peaks versus the remaining peaks using the Fisher exact test<sup>21</sup>, implemented by scipy<sup>22</sup>. The Fisher exact test gives a fast approximation of Monte Carlo-based simulations of the null distribution of intersection between two sets of genomic regions<sup>23</sup>.

### Joint representation

The topic composition of cell  $i$  is given by the expected value of the variational approximation of the posterior of  $Z_i$ , denoted  $\hat{Z}_i$ :

$$\hat{Z}_i = \mathbb{E}[q_\phi(Z_i | X_i)] \approx \text{softmax}(\mu_i),$$

where  $q$  is the variational distribution parameterized by the encoder neural network conditioned on the observed features of cell  $i$  and mean  $\mu_i \in \mathbb{R}^{N_{\text{topics}}}$  is given by the output layer of the network (see MIRA topic model: *Variational reparameterization* section). MIRA projects the  $N_{\text{topics}}$ -dimensional simplex space topic compositions for each cell to  $(N_{\text{topics}} - 1)$ -dimensional real space using the isometric log-ratio transformation (ILR)<sup>23</sup>:

$$\text{ILR}(\hat{Z}_i) = \left( \log \frac{\hat{Z}_{i1}}{g(\hat{Z}_i)}, \dots, \log \frac{\hat{Z}_{iN_{\text{topics}}}}{g(\hat{Z}_i)} \right) \cdot G$$

$$g(\hat{Z}_i) = \exp \left( \frac{1}{N_{\text{topics}}} \sum_{t=1}^{N_{\text{topics}}} \log \hat{Z}_{it} \right)$$

$$G_{t\tau} = \begin{cases} \frac{\sqrt{\tau/(\tau+1)}}{\tau} & \text{if } t < \tau + 1 \\ -\sqrt{\tau/(\tau+1)} & \text{if } t = \tau + 1 \\ 0 & \text{if } t > \tau + 1 \end{cases}$$

$$\text{for } t \in \{1, \dots, N_{\text{topics}}\} \\ \text{and } \tau \in \{1, \dots, (N_{\text{topics}} - 1)\}$$

where  $g(\hat{Z}_i)$  is the geometric mean of the composition of  $\hat{Z}_i$ , and  $G \in \mathbb{R}^{N_{\text{topics}} \times (N_{\text{topics}} - 1)}$  is a Gram-Schmidt orthonormalized basis matrix derived from an arbitrary hierarchical relationship between topic compositions<sup>24</sup>. Transformation to  $(N_{\text{topics}} - 1)$ -dimensional space by the  $G$  matrix aligns topic activations along an orthogonal basis. To create a joint representation encoding

information from both modalities, MIRA concatenates the isometric log-ratio transformed vectors for expression and accessibility topics into one vector representing the multimodal cell state,

$$J_i \in \mathbb{R}^{N_{\text{topics}}^{\text{RNA}} + N_{\text{topics}}^{\text{ATAC}} - 2} :$$

$$J_i = \text{ILR}(\hat{Z}_i^{\text{RNA}}) \oplus \text{ILR}(\hat{Z}_i^{\text{ATAC}}), \text{ for } i \in \{1, \dots, N_{\text{cells}}\}$$

Using the Manhattan distance between cells in the joint space, MIRA constructs a k-nearest neighbors (KNN) graph where edges represent cells with similar transcriptional and accessibility states. Assuming transitions between topics capture major biological state changes, those changes would be aligned along the axes in orthonormal ILR-transformed space. Therefore, the Manhattan distance represents the distance between cells as the transitions required to traverse the axes along topics to arrive at the other cells' biological state. In addition, the Manhattan distance has also been shown to preserve nearest-neighbor relationships in high-dimensional space better than Euclidean distance<sup>25</sup>.

The joint KNN graph may be used for clustering by the Leiden algorithm<sup>26</sup> and low-dimensional visualization using UMAP<sup>27</sup>. To generate UMAP visualizations, we use the default parameters given by the umap-learn Python package.

#### *Motif score*

Using the JASPAR CORE collection<sup>28</sup>, we call motifs hits within scATAC-seq peaks with the MOODS3 algorithm<sup>29</sup>. The adjusted p-value threshold is set to  $p < 1e-5$ . Then, we calculate motif scores  $Q \in \mathbb{R}^{N_{\text{cells}} \times N_{\text{factors}}}$  for each cell and each factor using the query likelihood model<sup>30</sup>. The score for TF  $h$  in cell  $i$  is given by the log-probability of sampling the set of regions predicted to be bound by  $h$ ,  $\mathcal{C}_h$  (the cistrome of  $h$ ), from the distribution of regions  $K$  given by the ATAC topic model:

$$Q_{ih} = \sum_{k \in (\mathcal{C}_h \cap K)} \log \hat{\rho}_{ik}^{\text{ATAC}} \text{ for } i \in \{1, \dots, N_{\text{cells}}\} \text{ and } h \in \{1, \dots, N_{\text{factors}}\}$$

where  $\hat{\rho}_i^{\text{ATAC}}$  is the composition of peaks in a cell given by the mean variational estimate of the latent topics  $\hat{Z}_i$ . The  $Q$  matrix is first normalized such that the factor scores in a cell have a Euclidean norm of 1, then each factor's scores are standardized to the standard normal distribution across all cells for comparability.

### **Pseudotime Trajectory Inference**

#### *Transport map construction*

A transport map, or Markov chain model  $\pi \in I^{N_{\text{cells}} \times N_{\text{cells}}}$  where  $I$  is the unit interval  $[0, 1]$ , describes the transition probabilities between cells progressing through a differentiation system:

$$\sum_{\zeta=1}^{N_{\text{cells}}} \pi_{i\zeta} = 1, \forall i \in \{1, \dots, N_{\text{cells}}\}$$

where  $\pi_{i\zeta}$  is the probability of transitioning from cell  $i$  to cell  $\zeta$  after an arbitrary discrete time step. MIRA uses the Palantir algorithm<sup>31</sup> to transform the undirected joint KNN graph describing cells in similar states into a directed transport map  $\pi$  representing the stochastic differentiation process based on multimodal transition probabilities. First, Palantir assigns each cell a pseudotime describing its progress through the differentiation process. Pseudotime  $s$  is taken to be the shortest path distance of traversing the joint KNN graph from the origin cell  $O$  to each cell  $i$ . Then, Palantir transforms the undirected joint KNN graph into a directed transport map by pruning edges in the joint KNN graph that travel “backwards” relative to the pseudotemporal flow of cells progressing from the user-chosen origin cell  $O$ .

From the transport map, MIRA identifies terminal cells where the forward progress of the differentiation reaches a stationary state at the end of each lineage. MIRA finds the left eigenvectors of the transport map whose eigenvalues are approximately one. The cells with the maximum value for each associated eigenvector mark the terminal states<sup>32</sup>.

Lastly, MIRA again uses the Palantir algorithm to assign to each cell a probability of reaching each lineage’s terminal state following a random walk through the transport map. We denote the probability of reaching the  $z^{th}$  terminal state from cell  $i$  following a random walk through the joint space derived transport map as  $p(J_z | J_i)$ .

#### *Lineage tree inference*

Here we describe a novel extension of the Palantir algorithm which uses the cell terminal state probabilities to construct a bifurcating tree structure representation of the data. MIRA determines lineages and branch points using the terminal fate probabilities found by Palantir. First, a lineage  $\ell_{Oz}$  is defined as the set of all cells for which the probability of reaching that lineage’s terminal state  $z$  is greater than or equal to the probability of reaching that terminus from the origin state  $O$ :

$$\ell_{Oz} = \{ i \in \{1, \dots, N_{\text{cells}}\} \mid p(J_z | J_i) \geq p(J_z | J_O) \}$$

The branch time  $s^*$  between two lineages with terminal states  $a$  and  $b$  is defined by:

$$s^*(O, a, b) = \min\{ s(i) \mid \text{abs}(F_i^{ab}) > \varepsilon, i \in \ell_{Oa} \cup \ell_{Ob} \}$$

$$F_i^{ab} = \log \frac{p(J_a | J_i) / p(J_b | J_i)}{p(J_a | J_O) / p(J_b | J_O)}, \text{ for } i \in \ell_{Oa} \cup \ell_{Ob}$$

First, all cells in lineages  $a$  and  $b$  are merged into a combined set of cells,  $\ell_{Oa} \cup \ell_{Ob}$ , then MIRA calculates  $F_i^{ab}$ , the log fold change of the ratios between the probability of reaching lineage terminus  $a$  versus lineage terminus  $b$  at cell  $i$  relative to the probability at the start cell  $O$ . Intuitively, before the branch between two lineages, the ratios of the probabilities of differentiating down two different trajectories is constant, and after the branch point, these probabilities diverge from the initial balance as cells become more likely to reach one terminal

state rather than the other. The branch time between two lineages is taken to be the pseudotime  $s$  of the first cell where  $F_i^{ab}$  exceeds some threshold  $\varepsilon$ .

To construct a bifurcating lineage tree using these definitions, MIRA starts with all terminal states as disconnected leaves. MIRA first finds the branch times between all lineages, and the lineages which branch latest in the differentiation are merged to create a new super-lineage, where each cell's probability of differentiating into the super-lineage is  $p(J_a | J_i) + p(J_b | J_i)$ . A node is added upstream connecting these lineages' terminal states with a branch point, and all cells in the lineages with a pseudotime greater than the branch time are assigned to the appropriate child of the branch node depending on which lineage they have more affinity to, determined by  $\text{sign}(F_i^{ab})$ . Then, MIRA recomputes branch times between the lineages to account for the super-lineage and again merges the last-branching trajectories. This process is repeated until all lineages have been connected to the root node and all cells have been assigned to a node.

## MIRA regulatory potential (RP) model

### Model architecture

The MIRA RP model relates changes in local accessible chromatin to gene expression by learning upstream and downstream distances of perceived regulatory influence that maximize the probability of observing the expression data given the accessibility state in the same single cells. MIRA models the generative process of sampling expression counts for gene  $j \in \{1, \dots, N_{\text{genes}}\}$  in cell  $i \in \{1, \dots, N_{\text{cells}}\}$  given the accessibility state  $A_i$  of the cell as:

$$X_{ij}^{\text{RNA}} \sim \text{NegativeBinomial}(n_i \rho_{ij}, \theta_j)$$

$$\rho_{ij} = \frac{e^{\lambda_{ij}}}{\sum_{g=1}^{N_{\text{genes}}} \exp(\text{batchnorm}_g(\hat{Z}_i^{\text{RNA}} \beta_{\cdot g}))}$$

$$\lambda_{ij} = \gamma_j \left( \frac{c_{ij} - \mu_j^{\text{bn}}}{\sigma_j^{\text{bn}}} \right) + b_j$$

$$c_{ij} = R(\mathfrak{D}_j, A_i, a_j, \delta_j, \Delta_j) = \sum_{\eta \in \{U, D, P\}} a_{j\eta} \sum_{\varsigma \in \mathfrak{D}_{j\eta}} A_{i\varsigma} 2^{-\delta_{j\varsigma} / \Delta_{j\eta}}$$

$$A_{i\varsigma} = \hat{\rho}_{i\varsigma}^{\text{ATAC}}$$

For each cell  $i$  and gene  $j$ , the  $R$  function takes as arguments: the genomic interval sets  $\mathfrak{D}_{j\eta}$  for  $\eta \in \{U, D, P\}$  which filters peaks based on strand-oriented positional relationships upstream (U), downstream (D), or proximal (P) to the gene transcription start site (TSS); the accessibility state  $A_i \in \mathbb{R}_{\geq 0}^{|\mathfrak{D}_{jU}| + |\mathfrak{D}_{jD}| + |\mathfrak{D}_{jP}|}$  of each locus in a cell; non-negative  $a_U, a_D$ , and  $a_P$  parameters that scale the relative effects of upstream (U), downstream (D), or proximal (P) accessibility ( $a_U, a_D, a_P \sim \text{HalfNormal}(0, 1)$ ), respectively; the distances  $\delta_j \in \mathbb{R}_{\geq 0}^{|\mathfrak{D}_{jU}| + |\mathfrak{D}_{jD}| + |\mathfrak{D}_{jP}|}$



from the TSS of gene  $j$  to the loci in the specified genomic interval set; and the decay rate parameters  $\Delta_{iD}$  and  $\Delta_{iU}$ .

The accessibility of each region in  $\mathcal{D}_{j\eta}$  is weighted by its distance from the TSS in terms of the learned decay rate parameter  $\Delta_{i\eta}$ , and the effects of all loci are summed together to summarize the *cis*-regulatory effect on gene expression. The accessibility state  $A_i$  of loci in cell  $i$  is taken to be the predicted compositional distribution  $\hat{\rho}_i^{\text{ATAC}}$  given by the chromatin accessibility topic model, to reduce noise and normalize for differences in read depth of ATAC observations between cells. The upstream and downstream region sets encompass regions between 1.5 and 600 kilobases from the TSS; the proximal region is within 1.5 kilobases from the TSS. Regions within 1.5 kilobases of other genes are masked.

The  $\Delta_{jD}$  and  $\Delta_{jU}$  parameters affect the respective downstream ( $D$ ) and upstream ( $U$ ) decay rates of local chromatin accessibility's influence on gene expression. The value of the parameter is the estimated distance, in kilobases, over which the influence of accessible sites on gene expression is halved,  $\Delta_U, \Delta_D \sim \text{LogNormal}(\log(15), 1.44)$ . The prior distribution reflects *a priori* information about the likely ranges of regulatory influence<sup>33,34</sup>, placing the mean decay distance at 15 kilobases and penalizing extreme ranges which suggest spurious long-range correlations. The variance given by 1.44 places the 90% and 99% quantiles of the prior over regulatory distances at 69 and 242 kilobases, respectively. Influence of accessibility in the promoter region is not decayed, thus  $\Delta_{jP}$  is set to  $\infty$ .

The model relates the *cis*-regulatory relationship  $c_{ij}$  to the observed expression data  $X_{ij}^{\text{RNA}}$  following the same generative statistical method as the expression topic model. Parameters  $\gamma_j$  and  $b_j$  form a Bayesian batch normalization function, which disconnects the magnitude of change in accessibility from that of gene expression and reduces the variance of gradient updates:  $\gamma_j \sim \text{LogNormal}(0,1)$ ,  $b_j \sim \text{Normal}(0, 25)$ .  $\theta_j$  regulates overdispersion of the negative binomial count observations,  $\theta_j \sim \text{Gamma}\left(2, \frac{1}{2}\right)$ .

The compositional rate of expression  $\rho_{ij}$  is estimated by approximating the softmax function of the RNA topic model using the RP model activation  $\lambda_{ij}$  for the numerator and topic model activations across all genes  $\hat{Z}_i^{\text{RNA}}\beta$  for the denominator. This ensures that the RP model is learning compositional relationships of gene expression consistent with those learned by the RNA topic model and that we may use the same estimated read depth random variable  $n_i$  estimated by the RNA topic model.

Notably, this model adjusts for technical variation and noise between both assays to learn regulatory distances describing the *cis*-regulatory relationship between local chromatin and expression.

### Parameter Estimation

The objective is to find parameters  $\vartheta$  that maximize the probability of the observed expression  $X^{\text{RNA}}$  given the accessibility state  $A$ :

$$\vartheta_{\max} = \operatorname{argmax}_{\vartheta} \log p_{\vartheta}(X^{\text{RNA}} | A)$$

$$\vartheta = \{a_{j\cdot}, \Delta_{j\cdot}, \gamma_j, b_j, \theta_j\}$$

MIRA employs variational inference<sup>3</sup> to estimate the posterior predictive distribution of the parameters given the data, using the variational distribution  $q$  and maximizing the ELBO objective. Point estimates for each parameter in the variational distribution are estimated using delta distributions. MIRA takes gradient steps to maximize the ELBO using the 2<sup>nd</sup> order Limited-memory Broyden–Fletcher–Goldfarb–Shanno algorithm (L-BFGS)<sup>35</sup>. Because the batch normalization parameters  $\mu_j^{\text{bn}}$  and  $\sigma_j^{\text{bn}}$  are updated after each batch but are not tuned by the optimizer, the gradient history may cause updates to become unstable. To prevent update instability, we implemented Frozen-batch L-BFGS<sup>36</sup>, a variant of L-BFGS that improves the algorithm’s performance in stochastic settings. MIRA trains until the loss does not decrease by more than a given threshold for three iterations.

### *NITE model architecture*

The RP model discussed above is defined as the local chromatin accessibility-influenced transcriptional expression (LITE) model. The LITE model learns a *cis*-regulatory relationship relating expression to local chromatin accessibility. The non-local chromatin accessibility-influenced transcriptional expression (NITE) model augments the LITE model to additionally include knowledge of cell-wide chromatin state through the incorporation of the MIRA latent accessibility topics as features. The specification of the NITE model mirrors the LITE model (see Regulatory Potential Modeling: *Model architecture* section) except for the inclusion of coefficients describing the relationship between cell-wide chromatin topics and expression:

$$c_{ij} = R(\mathcal{D}_j, A_i, a_j, \delta_j, \Delta_j) + \sum_{t=1}^{N_{\text{topics}}} a_t^{\text{topics}} \hat{Z}_{it}^{\text{ATAC}}$$

$$a_t^{\text{topics}} \sim \text{Normal}(0, 1), \text{ for } t \in \{1, \dots, N_{\text{topics}}\}$$

$$\theta_j^{\text{NITE}} \leftarrow \theta_j^{\text{LITE}}$$

The dispersion parameter  $\theta^{\text{NITE}}$  is fixed as the value learned by the LITE model for the same gene so performance differences between the LITE and NITE models are not driven by the effect of dispersion on the distribution of expression. For a given gene, MIRA first trains a LITE model, then seeds the variational distribution of the NITE model with the point estimates from the LITE model. NITE model training proceeds in the same manner as LITE model training and learns new values for each parameter.

### **LITE vs. NITE regulation test**

To test the ability for local chromatin to predict expression of a gene, we perform a likelihood ratio test<sup>37</sup> between the LITE and NITE models, where the null hypothesis is that the LITE model, based only on local chromatin features, is sufficient to predict expression:

$$\Lambda_j = -2 \log \frac{\mathcal{L}^{\text{LITE}}(\rho_j^{\text{LITE}} | X_j^{\text{RNA}})}{\mathcal{L}^{\text{NITE}}(\rho_j^{\text{NITE}} | X_j^{\text{RNA}})}, \text{ for } j \in \{1, \dots, N_{\text{genes}}\}$$

Here,  $\mathcal{L}^{\mathcal{M}}(\rho_j^{\mathcal{M}} | X_j^{\text{RNA}})$  is the likelihood of the expression predictions of model  $\mathcal{M}$ , the LITE or NITE model for that gene, given the observations of the expression of gene  $j$  across all cells, where  $X_j^{\text{RNA}} \in \mathbb{Z}_{\geq 0}^{N_{\text{cells}}}$ . The LITE and NITE models parameterize a negative binomial distribution of expression given the accessibility state  $A_i$  of the cell. Thus, for model  $\mathcal{M}$ :

$$\mathcal{L}^{\mathcal{M}}(\rho_j^{\mathcal{M}} | X_j^{\text{RNA}}) = \prod_{i=1}^{N_{\text{cells}}} p(X_{ij}^{\text{RNA}} = \text{NegativeBinomial}(n_i \rho_{ij}^{\mathcal{M}}, \theta_j^{\text{LITE}}))$$

If the expression predictions given the NITE model parameters are more likely given the observed data than the LITE model predictions, this increases the test statistic. The test statistic  $\Lambda_j$  is not directly comparable between genes due to differences induced by count variability, so we normalize all genes' test statistics to remove this effect:

$$\text{NITE score}_j = \frac{\Lambda_j}{1 + \frac{\sum_{i=1}^{N_{\text{cells}}} \mathbb{I}(X_{ij} > 0)}{\text{median}_{g \in \{1, \dots, N_{\text{genes}}\}} (\sum_{i=1}^{N_{\text{cells}}} \mathbb{I}(X_{ig} > 0))}}, \text{ for } j \in \{1, \dots, N_{\text{genes}}\}$$

where  $\mathbb{I}(\text{True}) = 1$  and  $\mathbb{I}(\text{False}) = 0$ .

Due to the properties of expression counts and the negative binomial distribution, both the LITE and NITE models predict zero counts for a gene with high probability. Thus, cells with no reads observed for a given gene are not as informative to the test, and genes which have a smaller fraction of zero counts have larger test statistics. Above, we scale the test statistic for each gene based on the number of nonzero counts relative to the median nonzero counts across all genes tested. When the number of nonzero counts for a gene is greater than the median the penalty to the test statistic increases. This procedure yields a comparable NITE score for each gene.

### Cell NITE score

The cell NITE score is calculated similarly to gene NITE score, except the test is performed on rows of the expression matrix  $X^{\text{RNA}}$  instead of columns:

$$\Lambda_i = -2 \log \frac{\mathcal{L}^{\text{LITE}}(\rho_i^{\text{LITE}} | X_i^{\text{RNA}})}{\mathcal{L}^{\text{NITE}}(\rho_i^{\text{NITE}} | X_i^{\text{RNA}})}, \text{ for } i = 1, \dots, N_{\text{cells}}$$

$$\text{NITE score}_i = \frac{\Lambda_i}{1 + \frac{\sum_{j=1}^{N_{\text{genes}}} \mathbb{I}(X_{ij} > 0)}{\text{median}_{k \in \{1, \dots, N_{\text{cells}}\}} (\sum_{j=1}^{N_{\text{genes}}} \mathbb{I}(X_{kj} > 0))}}, \text{ for } i = 1, \dots, N_{\text{cells}}$$

### Chromatin differential

The chromatin differential  $\chi$  in cell  $i \in \{1, \dots, N_{\text{cells}}\}$  for gene  $j \in \{1, \dots, N_{\text{genes}}\}$  is given by:

$$\chi_{ij} = \log \frac{\rho_{ij}^{\text{LITE}}}{\rho_{ij}^{\text{NITE}}}$$

which is the log-ratio of the compositional prediction of expression given by the LITE and NITE models.

### Probabilistic *in silico* deletion

#### Gene-TF associations

MIRA makes use of the LITE model and probabilistic *in silico* deletion (pISD) to predict the TFs that regulate a gene or set of genes<sup>38</sup>. This method assesses the strength of association between a gene and the observed or predicted TF binding sites by probing how the LITE model performance is affected by masking out scATAC-seq reads from that TF's binding sites. TFs that severely degrade the LITE model's predictive strength are more likely to be regulators of the gene than TFs for which binding site masking has no effect on the model's predictive strength. This method reveals TFs that bind regions where accessibility correlates with a given gene's expression.

As such, the pISD test compares the ability of the LITE model to predict expression  $X_j^{\text{RNA}}$  given the local chromatin accessibility around a gene, relative to its predictive ability after masking the set of accessible sites  $\mathfrak{C}_h$  predicted to be bound by a given TF  $h$ . If the TF  $h$  is predicted to bind regulatory regions that degrade the ability of the model to predict expression, this increases the value of the association score  $\mathcal{A}_{jh}$ .

MIRA's association score between gene  $j$  and TF  $h$  is given by the likelihood ratio test:

$$\mathcal{A}_{jh} = -2 \log \frac{\mathcal{L}^h(\rho_{\cdot j}^h | X_j^{\text{RNA}})}{\mathcal{L}(\rho_{\cdot j} | X_j^{\text{RNA}})}$$

The denominator describes the likelihood  $\mathcal{L}$  of the expression predictions  $\rho_{\cdot j}$  of the LITE model given  $X_j^{\text{RNA}}$  using all nearby accessible regions. The numerator describes the likelihood  $\mathcal{L}^h$  of the LITE model prediction of the expression of gene  $j$  when the regions  $\mathfrak{C}_h$  predicted to bind TF $_h$  are masked (modeling the TF $_h$ 's deletion  $\hat{h}$ ), and is given by:

$$\mathcal{L}^h(\rho_{\cdot j}^h | X_j^{\text{RNA}}) = \prod_{i=1}^{N_{\text{cells}}} p(X_{ij}^{\text{RNA}} = \text{NegativeBinomial}(n_i \rho_{ij}^h, \theta_j^{\text{LITE}}))$$

$$\rho_{ij}^h = \frac{e^{\lambda_{ij}^h}}{\sum_{g=1}^{N_{\text{genes}}} \exp(\text{batchnorm}_g(\hat{Z}_i^{\text{RNA}} \beta_g))}, \text{ for } i \in \{1, \dots, N_{\text{cells}}\}$$

$$\lambda_{ij}^h = \gamma_j \left( \frac{c_{ij}^h - \mu_j^{\text{bn}}}{\sigma_j^{\text{bn}}} \right) + b_j, \text{ for } i \in \{1, \dots, N_{\text{cells}}\}$$

$$c_{\cdot j}^h = \text{QuantileNorm}(R(\mathfrak{D}_j \setminus \mathfrak{C}_h, A_{\cdot}, a_{j\cdot}, \delta_{j\cdot}, \Delta_{j\cdot}), c_{\cdot j})$$

$$R(\mathcal{D}_j \setminus \mathcal{C}_h, A_{\cdot}, a_{j\cdot}, \delta_{j\cdot}, \Delta_{j\cdot}) = \sum_{\eta \in \{U, P, D\}} a_{j\eta} \sum_{\zeta \in \mathcal{D}_{j\eta} \setminus \mathcal{C}_h} A_{i\zeta} 2^{-\delta_{j\zeta} / \Delta_{j\eta}}$$

for  $i \in \{1, \dots, N_{\text{cells}}\}$

$$A_{i\zeta} = \hat{\rho}_{i\zeta}^{\text{ATAC}}$$

The same values for the learned parameters  $a_{j\cdot}$ ,  $\gamma_j$ ,  $b_j$ ,  $\Delta_j$ ,  $\mu_j^{\text{bn}}$ , and  $\sigma_j^{\text{bn}}$  are applied to the masked and the unmasked models and are determined from the maximum *a posteriori* estimate of the unmasked model. Masking regions around the gene reduces the amount of observed accessible chromatin in the LITE model and induces a downward shift in the value of the RP, which may confound detection of binding in binding sites that support driving of expression. To compensate for the shift, we perform quantile normalization<sup>39</sup> of the *cis*-regulatory prediction of the masked model to the distribution of the prediction from the unmasked model, mapping the distribution of  $c_{\cdot j}^h$  to  $c_{\cdot j}$ . This ensures that when the predictions are passed through the generative statistical model of expression, the difference in probability of observed expression is not influenced by the mean shift. Instead, the difference in probability is driven by differences in the ordering of predictions. For example, if a given gene's expression is solely defined by accessibility of a single upstream enhancer, masking that region will render the accessibility states indistinguishable whether the gene is expressed or not expressed. This drives an increase in the test statistic.

Because the predicted binding sites of TFs, whether given by motifs or by ChIP-seq occupancy, can be noisy and inaccurate, driver TF analysis gains statistical power from testing many genes against many TFs. However, testing every gene in every cell against every TF quickly becomes computationally intensive. Therefore, MIRA down-samples the cells used for each gene in the pISD test based on stratified sampling of its expression quanta. First, MIRA takes the log of expression in each cell and adds a pseudocount equal to mean log expression of the gene across all cells. Then the cells are sorted based on their expression level and divided into quanta such that the first group are the cells with the highest expression that comprise expression proportional to  $\frac{1}{N_{\text{bins}}}$  worth of the total expression, the second group are the cells with the next-highest expression comprising  $\frac{1}{N_{\text{bins}}}$  of the total expression, *et cetera*. An equal number of cells are taken from each bin so that a diverse array of expression states are sampled, but more informative highly-expressed states are prioritized. By default, 1500 cells are selected.

#### *Gene set driver TF test*

Since associations between individual genes and TFs are noisy due to the inability to ascertain a TF's true binding sites and regulatory influence in a particular cell, we instead test for shared influence of a TF across multiple genes with similar dynamics or properties. We predict TFs driving expression of a query set of genes using a one-sided Mann-Whitney U test<sup>40</sup> over the association scores  $\mathcal{A}$ . For each TF, MIRA compares the query gene set's association scores

with that TF versus a background gene set's association scores to find TFs with significantly higher association with the query set. By default, the background gene set is taken to be all genes for which association scores were estimated which are not in the query set.

### **Stream graphs**

MIRA renders stream graphs using Matplotlib<sup>41</sup>. In stream mode, the value of a feature at each pseudotime point is calculated by Savitzky-Golay<sup>42</sup> filter over a user-defined window size. Features are ordered by the pseudotime of their maximum value, which roughly layers features in the order in which they appear on the stream. In heatmap mode, each box represents the average value of cells within that window.

### **Software**

Models were implemented using Pyro<sup>7</sup> and PyTorch<sup>43</sup>, numerical calculations were implemented using Numpy<sup>44</sup>, and statistical tests were conducted with Scipy<sup>22</sup>. Data is stored in the AnnData structure for interoperability with Scanpy<sup>45</sup>. The MIRA analysis package is freely available at <https://github.com/cistrome/MIRA>.

### **Normalized expression**

Raw RNA-seq count matrices were normalized for streamplot and UMAP visualization using Scanpy's *normalize\_total* function, with *target\_sum* set to 10000.

### **Representation comparisons**

We compared representations generated by standard methods using either expression or accessibility data to those generated by MIRA topic modeling. Standard expression-based representations were calculated following Scanpy's recommended workflow. First, count matrices were normalized for read depth by the *normalize\_total* function with *target\_sum* set to 10000, followed by log-plus-one transformation. Genes with mean expression greater than 0.0125 and dispersion greater than 0.5 (default values) were taken to be highly variable. Next, each genes' log-normalized expression was standardized, and principal component analysis (PCA) was performed on the standardized expression of highly variable genes. A neighborhood graph of cells was then calculated using the PCA representation of the data, which was used to generate a UMAP representation.

Standard accessibility-based representations were calculated based on latent semantic indexing. Latent semantic indexing of ATAC-seq data was calculated using scikit-learn's<sup>46</sup> TF-IDF transformation, followed by truncated singular value decomposition (SVD) of all peaks. This was used to calculate a KNN graph with  $k=15$  using Euclidean distance on the first 50 eigenvectors, which then was used to generate a UMAP using the default parameters of the *umap-learn*<sup>27</sup> Python package.

### **Feature selection for expression topic model**

We calculated dispersions and mean counts from log-normalized expression using Scanpy. Genes with mean expression greater than 0.0125 and dispersion greater than 0 were selected as exogenous features. Genes from that group that had dispersion greater than 0.5 were selected as endogenous features for the encoder network.

### **Feature selection for accessibility topic model**

All peaks identified for the 10X brain dataset were used as endogenous and exogenous features. All peaks identified for the SHARE-seq skin dataset were used as exogenous features, and 100,000 peaks were randomly selected as endogenous features.

### **Data availability**

The authors of the SHARE-seq skin study<sup>48</sup> provide the RNA-seq count matrix at <https://www.ncbi.nlm.nih.gov/geo/query/acc.cgi?acc=GSM4156608> and the ATAC-seq peak count matrix at <https://www.ncbi.nlm.nih.gov/geo/query/acc.cgi?acc=GSM4156597>. 10X provides the brain dataset<sup>49</sup> RNA-seq count matrix and ATAC-seq peak count matrix at <https://www.10xgenomics.com/resources/datasets/fresh-embryonic-e-18-mouse-brain-5-k-1-standard-2-0-0>.

### **Data preprocessing**

We used the count matrices provided by the authors of the SHARE-seq skin study<sup>48</sup> for our analysis. CellRanger count matrices were used for the 10X brain dataset<sup>49</sup>.

### **Skin dataset cell type selection**

We calculated one expression and one accessibility topic model describing all cells in the SHARE-seq skin data including the hair follicle, interfollicular epidermis (IFE), and mesenchymal cell populations. The joint KNN graph was defined by topics across all cell types. Cells were clustered using the Leiden algorithm on the joint KNN graph with a resolution of 2.5. Then, clusters were merged and assigned cell type labels using known skin marker gene expression. Cell type labels were cross-referenced with those provided by the authors of the original SHARE-seq skin study<sup>48</sup>. We then used labeled cells corresponding to the hair follicle or IFE for downstream analyses. Mesenchymal cell populations were not further analyzed. For the hair follicle, we re-calculated the UMAP representation from the joint KNN graph subset. When training RP models, we used all cells in the hair follicle and the IFE, excluding the mesenchymal cells.

### **Skin poised gene identification**

To classify cortex and medulla gene expression based on branch dynamics, we first found genes that were differentially-expressed between lineages using Scanpy's *rank\_gene\_groups* (Wilcoxon with Benjamini-Hochberg correction), with adjusted p-value less than 0.1 and log2 fold change between populations greater than 1. Next, we classified differentially-expressed genes based on their expression at the branch. Genes were denoted "expressed at branch" if they were neither differentially-expressed between the matrix and cortex cells, nor between matrix and medulla cells, again with adjusted p-value less than 0.1 and log2 fold change greater than 1. Lastly, we determined a gene to be poised if it was not expressed at the branch, if its average chromatin differential was greater than 0.15 in cells at the branch point, and if its NITE score was greater than 5 (Extended Data Fig. 5e). The top 200 cells scored by branch accessibility topic a4 composition were chosen as branch cells.

### **Skin poised gene driver TF analysis**

We identified driver TFs of cortex and medulla fate commitment using probabilistic *in silico* deletion. Query sets encompassing the medulla-poised and cortex-poised genes were compared to the background genes that included all other genes for which RP models were trained. The background gene set thus included all highly-variable genes (see Feature selection for expression topic model section), in addition to the top 200 most-activated genes for any topic.

### **IFE differentially-expressed terminal genes**

We identified terminally upregulated genes that were differential-expressed between the granular and intermediate granular cell populations in the IFE. First, differentially-expressed genes between granular populations were identified using Scanpy's *rank\_gene\_groups* (Wilcoxon with Benjamini-Hochberg correction), with adjusted p-value less than 0.1 and log2 fold change between populations greater than 1. Then we selected genes that were differentially-expressed between granular and spinous cells, or between intermediate granular and intermediate spinous cells, with adjusted p-value less than 0.1 and log2 fold change greater than 1. Therefore, we defined terminally upregulated, differentially-expressed genes as those which were both differentially-expressed between granular lineages and upregulated in the granular populations relative to their precursor spinous populations.

### **Brain dataset cell type selection**

In addition to the major cell populations described in the main text, the 10X brain dataset also detected a minimal number of Olig1/2+ oligodendrocytes, VWF+/Cdh5+ endothelial cells, and Reelin-positive cells potentially consistent with Cajal-Retzius cells, a transient molecularly and morphologically distinct neuronal population in the developing cerebral cortex. All cells in the dataset were included for MIRA topic modeling, but these minimally detected cell populations were excluded from trajectory analyses due to being too small in number to reliably determine their state along pseudotime and due to the endothelial and Reelin-positive cells being distinct from the major lineages represented in the data. The expression topics exclusively associated with the endothelial and Reelin-positive clusters were therefore also excluded from the later trajectory analyses.

### **Extended data references**

1. Blei, D. M., Ng, A. Y. & Jordan, M. I. Latent Dirichlet Allocation. *Journal of Machine Learning Research* **3**, 993–1022 (2003).
2. Kingma, D. P. & Welling, M. Auto-Encoding Variational Bayes. *arXiv:1312.6114* (2013).
3. Hoffman, M. D. *et al.* Stochastic Variational Inference. *Journal of Machine Learning Research* **14**, 1303–1347 (2013).
4. Lopez, R., Regier, J., Cole, M. B., Jordan, M. I. & Yosef, N. Deep generative modeling for single-cell transcriptomics. *Nature Methods* **15**, 1053–1058 (2018).
5. Choi, K., Chen, Y., Skelly, D. A. & Churchill, G. A. Bayesian model selection reveals biological origins of zero inflation in single-cell transcriptomics. *Genome Biology* **21**, 1–16 (2020).



6. Ioffe, S. & Szegedy, C. Batch Normalization: Accelerating Deep Network Training by Reducing Internal Covariate Shift. *32nd International Conference on Machine Learning, ICML 2015* **1**, 448–456 (2015).
7. Bingham, E. *et al.* Pyro: Deep Universal Probabilistic Programming. *Journal of Machine Learning Research* **20**, 1–6 (2019).
8. Srivastava, A. & Sutton, C. Autoencoding Variational Inference For Topic Models. *5th International Conference on Learning Representations, ICLR 2017 - Conference Track Proceedings* (2017).
9. Dugas, C., Bengio, Y., Bélisle, F., Nadeau, C. & Garcia, R. Incorporating Second-Order Functional Knowledge for Better Option Pricing. in *Proceedings of the 13th International Conference on Neural Information Processing Systems* 451–457 (MIT Press, 2000).
10. Townes, F. W., Hicks, S. C., Aryee, M. J. & Irizarry, R. A. Feature selection and dimension reduction for single-cell RNA-Seq based on a multinomial model. *Genome Biology* **20**, 1–16 (2019).
11. Deng, L. *et al.* Recent advances in deep learning for speech research at Microsoft. *ICASSP, IEEE International Conference on Acoustics, Speech and Signal Processing - Proceedings* 8604–8608 (2013) doi:10.1109/ICASSP.2013.6639345.
12. Srivastava, N., Hinton, G., Krizhevsky, A. & Salakhutdinov, R. Dropout: A Simple Way to Prevent Neural Networks from Overfitting. *Journal of Machine Learning Research* **15**, 1929–1958 (2014).
13. Iyyer, M., Manjunatha, V., Boyd-Graber, J. & Daumé III, H. Deep Unordered Composition Rivals Syntactic Methods for Text Classification. in *Proceedings of the 53rd Annual Meeting of the Association for Computational Linguistics and the 7th International Joint Conference on Natural Language Processing (Volume 1: Long Papers)* 1681–1691 (Association for Computational Linguistics, 2015). doi:10.3115/v1/P15-1162.
14. Kingma, D. P. & Ba, J. L. Adam: A Method for Stochastic Optimization. *3rd International Conference on Learning Representations, ICLR 2015 - Conference Track Proceedings* (2014).
15. Smith, L. N. & Topin, N. Super-Convergence: Very Fast Training of Neural Networks Using Large Learning Rates. *36* (2017) doi:10.1117/12.2520589.
16. Bowman, S. R. *et al.* Generating Sentences from a Continuous Space. *CoNLL 2016 - 20th SIGNLL Conference on Computational Natural Language Learning, Proceedings* 10–21 (2015) doi:10.18653/v1/k16-1002.
17. Bergstra, J., Bardenet, R., Bengio, Y. & Kégl, B. Algorithms for Hyper-Parameter Optimization. in *Advances in Neural Information Processing Systems* (eds. Shawe-Taylor, J., Zemel, R., Bartlett, P., Pereira, F. & Weinberger, K. Q.) vol. 24 (Curran Associates, Inc., 2011).
18. Akiba, T., Sano, S., Yanase, T., Ohta, T. & Koyama, M. Optuna: A Next-generation Hyperparameter Optimization Framework. *Proceedings of the ACM SIGKDD International Conference on Knowledge Discovery and Data Mining* 2623–2631 (2019) doi:10.1145/3292500.3330701.
19. Jamieson, K. & Talwalkar, A. Non-stochastic Best Arm Identification and Hyperparameter Optimization. *Proceedings of the 19th International Conference on Artificial Intelligence and Statistics, AISTATS 2016* 240–248 (2015).
20. Chen, E. Y. *et al.* Enrichr: Interactive and collaborative HTML5 gene list enrichment analysis tool. *BMC Bioinformatics* **14**, 1–14 (2013).
21. Fisher, R. A. On the Interpretation of  $\chi^2$  from Contingency Tables, and the Calculation of P. *Journal of the Royal Statistical Society* **85**, 87 (1922).
22. Virtanen, P. *et al.* SciPy 1.0: fundamental algorithms for scientific computing in Python. *Nature Methods* **2020** *17:3* **17**, 261–272 (2020).

23. Layer, R. M. *et al.* GIGGLE: a search engine for large-scale integrated genome analysis. *Nature Methods* **15**, 123–126 (2018).
24. Egozcue, J. J., Pawlowsky-Glahn, V., Mateu-Figueras, G. & Barceló-Vidal, C. Isometric Logratio Transformations for Compositional Data Analysis. *Mathematical Geology* **35**, 279–300 (2003).
25. Silverman, J. D., Washburne, A. D., Mukherjee, S. & David, L. A. A phylogenetic transform enhances analysis of compositional microbiota data. *eLife* **6**, (2017).
26. Aggarwal Charu C. and Hinneburg, A. and K. D. A. On the Surprising Behavior of Distance Metrics in High Dimensional Space. in *Database Theory — ICDT 2001* (ed. den Bussche Jan and Vianu, V.) 420–434 (Springer Berlin Heidelberg, 2001).
27. Traag, V. A., Waltman, L. & van Eck, N. J. From Louvain to Leiden: guaranteeing well-connected communities. *Scientific Reports* 2019 9:1 **9**, 1–12 (2019).
28. McInnes, L., Healy, J. & Melville, J. UMAP: Uniform Manifold Approximation and Projection for Dimension Reduction. (2018).
29. Fornes, O. *et al.* JASPAR 2020: update of the open-access database of transcription factor binding profiles. *Nucleic Acids Research* **48**, D87–D92 (2020).
30. Korhonen, J. H., Palin, K., Taipale, J. & Ukkonen, E. Fast motif matching revisited: high-order PWMs, SNPs and indels. *Bioinformatics* **33**, 514–521 (2017).
31. Ponte, J. M. & Croft, B. W. A language modeling approach to information retrieval. *Proc. of the 21st annual ACM SIGIR conference on Research and development in information retrieval* 275–281 (1998).
32. Setty, M. *et al.* Characterization of cell fate probabilities in single-cell data with Palantir. *Nature Biotechnology* 2019 37:4 **37**, 451–460 (2019).
33. Bergen, V., Lange, M., Peidli, S., Wolf, F. A. & Theis, F. J. Generalizing RNA velocity to transient cell states through dynamical modeling. *Nature Biotechnology* **38**, 1408–1414 (2020).
34. Chen, C. H. *et al.* Determinants of transcription factor regulatory range. *Nature Communications* 2020 11:1 **11**, 1–15 (2020).
35. Avsec, Ž. *et al.* Effective gene expression prediction from sequence by integrating long-range interactions. *Nature Methods* 2021 18:10 **18**, 1196–1203 (2021).
36. Liu, D. C. & Nocedal, J. On the limited memory BFGS method for large scale optimization. *Mathematical Programming* 1989 45:1 **45**, 503–528 (1989).
37. Yadav, A., Goldstein, T. & Jacobs, D. Making L-BFGS Work with Industrial-Strength Nets. *BMVC* (2020).
38. Pearson, E. S. & Naymon, J. On the Use and Interpretation of Certain Test Criteria for Purposes of Statistical Inference. *Biometrika* **20**, 275–240 (1928).
39. Qin, Q. *et al.* Lisa: inferring transcriptional regulators through integrative modeling of public chromatin accessibility and ChIP-seq data. *Genome Biology* **21**, 1–14 (2020).
40. Amaratunga, D. & Cabrera, J. Analysis of Data From Viral DNA Microchips. *Journal of the American Statistical Association* **96**, 1161–1170 (2011).
41. Wilcoxon, F. Individual Comparisons by Ranking Methods. *Biometrics Bulletin* **1**, 80 (1945).
42. Hunter, J. D. Matplotlib: A 2D Graphics Environment. *Computing in Science Engineering* **9**, 90–95 (2007).
43. Savitzky, A. & Golay, M. J. E. Smoothing and Differentiation of Data by Simplified Least Squares Procedures. *Analytical Chemistry* **36**, 1627–1639 (2002).
44. Paszke, A. *et al.* PyTorch: An Imperative Style, High-Performance Deep Learning Library. in *Advances in Neural Information Processing Systems* 32 (eds. Wallach, H. *et al.*) 8024–8035 (Curran Associates, Inc., 2019).
45. Harris, C. R. *et al.* Array programming with NumPy. *Nature* 2020 585:7825 **585**, 357–362 (2020).

46. Wolf, F. A., Angerer, P. & Theis, F. J. SCANPY: Large-scale single-cell gene expression data analysis. *Genome Biology* **19**, 1–5 (2018).
47. Pedregosa, F. *et al.* Scikit-learn: Machine Learning in Python. *Journal of Machine Learning Research* **12**, 2825–2830 (2011).
48. Ma, S. *et al.* Chromatin Potential Identified by Shared Single-Cell Profiling of RNA and Chromatin. *Cell* **183**, 1103-1116.e20 (2020).
49. Fresh embryonic E18 mouse brain (5k). Single Cell Multiome ATAC + Gene Expression Dataset by Cell Ranger ARC 2.0.0. (2021).
